# Supplementary material for: Anticancer Activities of Mushrooms: A Neglected Source for Drug Discovery
Source: MDPI journal article supplement (doi:10.3390/ph15020176), 2022-01-31
Supplement: s1 [file s1]

# **Anticancer activities of mushrooms: a neglected source for drug discovery**

**Sujogya Kumar Panda<sup>1,2,3\*</sup>, Gunanidhi Sahoo<sup>2</sup>, Shasank S. Swain<sup>4</sup> and Walter Luyten<sup>3</sup>**

<sup>1</sup> Center of Environment, Climate Change and Public Health, RUSA 2.0, Utkal University, Bhubaneswar-751004, India. Email- sujogyapanda@utkaluniversity.ac.in (SKP)

<sup>2</sup> Department of Zoology, Utkal University, Bhubaneswar-751004, India. Email- sahoogunanidhi.zool@utkaluniversity.ac.in (GS)

<sup>3</sup> Department of Biology, KU Leuven, 3000 Leuven, Belgium. Email- walter.luyten@kuleuven.be (WL)

<sup>4</sup> Division of Microbiology and NCDs, ICMR-Regional Medical Research Centre, Bhubaneswar 751023, India. Email-swain.shasanksekhar86@gmail.com (SSS)

\* Correspondence: Email-sujogyapanda@utkaluniversity.ac.in (SKP)

**Supplementary materials**

**Table S1.** Clinical studies of mushrooms with anticancer activity (source <https://pubmed.ncbi.nlm.nih.gov/>).

| Scientific name                                                                                                                                                                          | Study design                                                      |                    |                                                                                                |                                                                                                                | Duration of treatment                                                      | Type of cancer/ Stage                                           | Outcomes                                                                                                                                                                                                                                  | Reference |
|------------------------------------------------------------------------------------------------------------------------------------------------------------------------------------------|-------------------------------------------------------------------|--------------------|------------------------------------------------------------------------------------------------|----------------------------------------------------------------------------------------------------------------|----------------------------------------------------------------------------|-----------------------------------------------------------------|-------------------------------------------------------------------------------------------------------------------------------------------------------------------------------------------------------------------------------------------|-----------|
| [English name]                                                                                                                                                                           | Type of study                                                     | Number of patients | Parameters                                                                                     | Dose                                                                                                           |                                                                            |                                                                 |                                                                                                                                                                                                                                           |           |
| <i>Agaricus bisporus</i> (J.E. Lange) Imbach (1946);<br>Synonym <i>Psalliota hortensis</i> f. <i>bispora</i> J.E. Lange (1926);<br>[white button mushroom]                               | Phase I trial                                                     | 32                 | Determination of the effect on biochemical parameters blood, serum and evaluation of toxicity. | Mushroom powder: 6 dosages start with 4 g/d. The highest dosage was capped at 14 g/d (i.e., 28 tablets daily). | -                                                                          | Prostate cancer                                                 | Appeared to reduce prostate cancer by decreasing immune-suppressive factors.                                                                                                                                                              | [1]*      |
| <i>Agaricus blazei</i> auct. non Murrill (1945); synonyms <i>Agaricus subrufescens</i> Peck (1893); <i>Agaricus rufotegulis</i> Nauta (1999); <i>Agaricus blazei</i> Murill Kyowa (AbMK) | Randomized, placebo-controlled, double-blind clinical trial (RCT) | 100                | Immunological status, side effects, quality of life (QOL).                                     | Daily oral consumption of mushroom extracts for 3 weeks.                                                       | Every three weeks, at least for 3 cycles after treatment of chemo-therapy. | Cervical, ovarian, endometrial cancer undergoing chemo-therapy. | Between treated and non-treated groups, there was no significant difference w.r.t. lymphokine-activated killer and monocyte activities. Also, several side effects were improved by <i>verum</i> only when treated with mushroom extract. | [2]*      |
| <i>Agaricus blazei</i>                                                                                                                                                                   | Phase I clinical trial                                            | 5                  | Effect on gene expression in peripheral blood cells.                                           | $\beta$ -glucan extract.                                                                                       | -                                                                          | Chronic hepatitis C infection.                                  | No changes in mRNA level (G-protein coupled receptor signaling pathway, cell cycling, and                                                                                                                                                 | [3]*      |

|                                                                                              |     |    |                                                                                                                                  |                                                                                                                          |          |                                                               |                                                                                                                                                                                                                                                   |      |
|----------------------------------------------------------------------------------------------|-----|----|----------------------------------------------------------------------------------------------------------------------------------|--------------------------------------------------------------------------------------------------------------------------|----------|---------------------------------------------------------------|---------------------------------------------------------------------------------------------------------------------------------------------------------------------------------------------------------------------------------------------------|------|
|                                                                                              |     |    |                                                                                                                                  |                                                                                                                          |          |                                                               | transcriptional regulation).                                                                                                                                                                                                                      |      |
| <i>Agaricus blazei</i>                                                                       | RCT | 40 | Immuno-modulatory effects (changes in serum levels and hematological parameters (HP), involvement of genes in immune activation. | AndoSan™ ( <i>Agaricus blazei</i> =82.4%, <i>Hericium erinaceus</i> =14.7% and <i>Grifola frondosa</i> = 2.9%); 60 mL/d. | 7 weeks  | Multiple myeloma undergoing high dose chemotherapy, phase II. | AndoSan™ as adjuvant therapy to high dose of melphalan improved a few immune-modulating effects. In addition, increase in serum levels (IL-1, IL-5 and IL- 7) as well as expression of antibodies and killer immunoglobulin receptor (KIR) genes. | [4]* |
| <i>Agaricus sylvaticus</i> Schaeff. (1774); [scaly wood / blushing wood / pinewood mushroom] | RCT | 56 | QOL indicators.                                                                                                                  | Extract (30 mg/kg/d; 6 tablets per day).                                                                                 | 6 months | Colorectal cancer, stage I-III                                | QOL improved after post-surgical phase with dietary supplement containing <i>A. sylvaticus</i> .                                                                                                                                                  | [5]  |
| <i>Agaricus sylvaticus</i>                                                                   | RCT | 56 | Complete hemogram, serum iron, and fasting glycaemia.                                                                            | Extract (30 mg/kg/d; 6 tablets per day).                                                                                 | 6 months | Colorectal cancer, stage I-III                                | Significant increases in hemoglobin, hematocrit, erythrocytes and neutrophil levels: platelet count significantly reduced but remained within normal levels. Reduced glycaemia levels.                                                            | [6]  |

|                                                                    |     |    |                                                                                                                                                                                                           |                                                                                       |          |                                  |                                                                                                                                                                                        |       |
|--------------------------------------------------------------------|-----|----|-----------------------------------------------------------------------------------------------------------------------------------------------------------------------------------------------------------|---------------------------------------------------------------------------------------|----------|----------------------------------|----------------------------------------------------------------------------------------------------------------------------------------------------------------------------------------|-------|
| <i>Agaricus sylvaticus</i>                                         | RCT | 56 | Glucose, total cholesterol, creatinine, alkaline phosphatase, bilirubin, aspartate aminotransferase and alanine aminotransferase; IgA, IgG and IgM; total proteins and protein fractions; blood pressure. | Extract (30 mg/kg/d; 6 tablets per day).                                              | 6 months | Colorectal cancer, stage I-III   | Significant reduction of fasting plasma glucose, total cholesterol, creatinine, aspartate aminotransferase, alanine aminotransferase, IgA, IgM, systolic and diastolic blood pressure. | [7]   |
| <i>Agaricus sylvaticus</i>                                         | RCT | 56 | Three fasting glycaemia evaluations at start of treatment and after 3 and 6 months.                                                                                                                       | Extract (30 mg/kg/d; 6 tablets per day).                                              | 6 months | Colorectal cancer, stage I-III   | Significantly reduced fasting glycemia level after 6 months in post-surgery colorectal cancer patients.                                                                                | [8]   |
| <i>Agaricus sylvaticus</i> supplementation                         | RCT | 46 | Chemotherapy-associated adverse effects.                                                                                                                                                                  | Dietary supplementation containing mushroom (2.1 g/d) or placebo (6 tablets per day). | 6 months | Breast cancer, stage II and III. | Improved nutritional status with reduced adverse effects (nausea, vomiting and anorexia).                                                                                              | [9]   |
| <i>Antrodia cinnamomea</i><br>Chang & Chou (1995)<br>[AC mushroom] | RCT | 37 | 6-month overall survival (OS), disease control rate, QOL, adverse event (AE).                                                                                                                             | 20-mL oral formulations prepared from <i>A. cinnamomea</i> twice a day.               | 30 days  | Advanced cancer.                 | <i>A. cinnamomea</i> in combination with chemotherapy was not effective to improve outcome in cancer patients.                                                                         | [10]* |

|                                                                                                                  |                                            |    |                                                  |                                                                                                                                                                 |             |                                              |                                                                                                                                                                           |       |
|------------------------------------------------------------------------------------------------------------------|--------------------------------------------|----|--------------------------------------------------|-----------------------------------------------------------------------------------------------------------------------------------------------------------------|-------------|----------------------------------------------|---------------------------------------------------------------------------------------------------------------------------------------------------------------------------|-------|
|                                                                                                                  |                                            |    |                                                  |                                                                                                                                                                 |             |                                              | “The combination may present a potential risk of lowered platelet counts. Adequately powered clinical trials will be necessary to address this question.”.                |       |
| <i>Coriolus versicolor</i> (L.) Quél. (1886); synonym <i>Trametes versicolor</i> (L.) Lloyd (1920) [Turkey tail] | RCT                                        | 15 | QOL, progression-free survival, OS and toxicity. | Standard continuous daily dose of 2.4 g. Median treatment duration was 1.5 cycles (5.9 weeks) and 3 cycles (12.1 weeks) for placebo and mushroom, respectively. | -           | Hepatocellular carcinoma (HCC)               | HCC patients taking mushroom had better social and emotional functioning scores, as well as less pain and loss of appetite (LOA) compared to placebo-treated subjects.    | [11]* |
| <i>Trametes versicolor</i>                                                                                       | Phase I, two-center, dose escalation study | 11 | Immune parameters                                | Chemo- and radiotherapy-treated women were given freeze-dried mycelial powder doses 3, 6 and 9g/d.                                                              | 6 weeks     | Breast cancer                                | Increase in lymphocyte counts and NK cell functional activity with dose 6 and 9 g/d. In addition, increase in CD8(+) T cells and CD19(+) B cells, but not CD4(+) T cells. | [12]  |
| <i>Ganoderma lucidum</i>                                                                                         | Pilot clinical trial                       | 48 | FACT-F, HADS, and EORTC QLQ-                     | Spore powder of <i>Ganoderma lucidum</i>                                                                                                                        | Four weeks. | Patients with reast cancer, stage I-III with | Treated cancer patients showed significant                                                                                                                                | [13]  |

|                                                                                           |                                             |    |                                                                   |                                                                                                                |          |                                                                                  |                                                                                                                                     |       |
|-------------------------------------------------------------------------------------------|---------------------------------------------|----|-------------------------------------------------------------------|----------------------------------------------------------------------------------------------------------------|----------|----------------------------------------------------------------------------------|-------------------------------------------------------------------------------------------------------------------------------------|-------|
|                                                                                           |                                             |    | C30 questionnaires                                                | 1 g three times a day for 4 weeks                                                                              |          | cancer-related fatigue undergoing endocrine therapy                              | enhancements in physical well-being and fatigue with a reduced amount of anxiety and depression.                                    |       |
| <i>Grifola frondosa</i> (Dicks.: Fr.) Gray                                                | Prospective, non-controlled, clinical trial | 15 | Blood and chemistry profile, body weight, and tumor measurements. | Mushroom extract (dose of 3 drops/kg/d). Doses divided into 2 and given 1 hour before feeding.                 | 12 weeks | Lymphoma in dogs                                                                 | Administration of maitake extract did not improve significantly lymph node size by greater than 50% (objective response) in any dog | [14]* |
| <i>Grifola frondosa</i>                                                                   | Phase I/II, dose escalation trial           | 34 | Safety and tolerability                                           | Liquid polysaccharide extracts (oral administration of 0.1, 0.5, 1.5, 3.0, or 5 mg/kg twice daily for 3 weeks. | 3 weeks  | Post-menopausal breast cancer patients, free of disease after initial treatment. | Maitake extracts affects both immunological stimulatory and inhibitory parameters in peripheral blood.                              | [15]* |
| <i>Grifola frondosa</i>                                                                   | Phase II study                              | 21 | Innate immune function in myelodys-plastic syndromes (MDS)        | Powder (3 mg/kg), oral administration of twice per day.                                                        | 12 weeks | Blood cancer.                                                                    | Maitake has beneficial immunomodulatory potential in MDS.                                                                           | [16]* |
| <i>Lentinula edodes</i> (Berk.) Pegler (1976), Synonym: <i>Lentinus edodes</i> [Shiitake] | Phase II clinical trial                     | 74 | Adverse effects, change of prostate specific antigen and QOL.     | Mushroom extract, active hexose correlated compound (AHCC®, 4.5 g/d), an extract prepared from                 | 6 months | Prostate cancer, early stage                                                     | Mushroom extract failed to reduce by >50% prostate-specific antigen.                                                                | [17]* |

| cultured mycelia<br>of <i>Lentinula edodes</i> .            |                                                                                                                       |    |                                                                                                   |                                               |          |                                                     |                                                                                                                                                                                                            |
|-------------------------------------------------------------|-----------------------------------------------------------------------------------------------------------------------|----|---------------------------------------------------------------------------------------------------|-----------------------------------------------|----------|-----------------------------------------------------|------------------------------------------------------------------------------------------------------------------------------------------------------------------------------------------------------------|
| <i>Lentinula edodes</i>                                     | Exploratory clinical trial                                                                                            | 7  | QOL score, lymphocyte activity and serum immune indices.                                          | <i>Lentinula edodes</i> mycelia extract       | -        | Chemotherapy for breast or gastrointestinal cancer. | The concomitant use of <i>Lentinula edodes</i> mycelia extract with chemotherapy is safe and improves the QOL score, NK cell activity and immunosuppressive acidic protein levels in cancer patients. [18] |
| <i>Lentinus edodes</i>                                      | Clinical trial                                                                                                        | 62 | Prostate-specific antigen level.                                                                  | Oral administration of capsules thrice daily. | 6 months | Prostate cancer                                     | Administration of <i>L. edodes</i> extract in prostate cancer patients failed to stabilize or halt progression of disease. [19]*                                                                           |
| <i>Lentinus edodes</i> , Shiitake mushroom product, (AHCC®) | Clinical trial<br>Evaluation of safety and effectiveness of AHCC for adverse effects and QOL in patients with cancer. | 24 | Blood test, EORTC QLQ-C30 questionnaire, and DNA levels of herpes virus type 6 (HHV-6) in saliva. | Intake of AHCC® p.o., 3 g/d.                  | .        | Various cancer, treated with chemotherapy.          | AHCC® improved the QOL scores, without hematotoxicity and hepatotoxicity and decreased the levels of herpesvirus in the saliva of patients who received chemotherapy. [20]*                                |

(-) Data not available; \*Papers also retrieved from SciFinder

**Table S2.** Other trials of mushroom(s)/compound(s) with anticancer activity not retrieved from PubMed (source <https://scholar.google.com/> ).

| Scientific name<br>[English name] | Study design   |                       |                                                                                                                                                                                                                     |                                                                                                                       | Duration of<br>treatment | Type of cancer/<br>Stage    | Outcomes                                                                                                                                                                                                                                                                                                                                                                                                           | Reference |
|-----------------------------------|----------------|-----------------------|---------------------------------------------------------------------------------------------------------------------------------------------------------------------------------------------------------------------|-----------------------------------------------------------------------------------------------------------------------|--------------------------|-----------------------------|--------------------------------------------------------------------------------------------------------------------------------------------------------------------------------------------------------------------------------------------------------------------------------------------------------------------------------------------------------------------------------------------------------------------|-----------|
|                                   | Type of study  | Number of<br>patients | Parameters                                                                                                                                                                                                          | Dose                                                                                                                  |                          |                             |                                                                                                                                                                                                                                                                                                                                                                                                                    |           |
| <i>Cordyceps sinensis</i>         | Clinical study | 36                    | Immune functions                                                                                                                                                                                                    | -                                                                                                                     | -                        | Several with advanced stage | Jinshuibao capsule (containing constituents similar to <i>Cordyceps sinensis</i> ) restored cellular immunological function, improved QOL, but had no substantial effect on humoral immune function.                                                                                                                                                                                                               | [21]      |
| <i>Ganoderma lucidum</i>          | Open label     | 36                    | Immune functions: mean mitogenic reactivity to phytohemagglutinin, mean counts of CD3, CD4, CD8, and CD56, mean plasma concentrations of interleukin (IL)-2, IL-6, and interferon (IFN)- $\gamma$ , or NK activity. | 5.4 g/d Ganopoly® ( <i>Ganoderma lucidum</i> polysaccharides from Encore International Corp., Auckland, New Zealand). | 12 weeks.                | Lung cancer, advanced stage | Ganopoly did not significantly alter the tested immune parameters.                                                                                                                                                                                                                                                                                                                                                 | [22]      |
| <i>Ganoderma lucidum</i>          | Open label     | 36                    | Immune parameters (cytokines, T cell subsets, mitotic response to phytohaemagglutinin and natural killer (NK) activity).                                                                                            | 1800 mg/d Ganopoly®.                                                                                                  | 12 weeks                 | Advanced stage cancer.      | Ganopoly® significant increased mean plasma concentrations of IL-2, IL-6, and IFN- $\gamma$ , whereas the levels of IL-1 and TNF- $\alpha$ were significantly decreased. The mean absolute number of CD56+ cells was significantly increased, whereas the numbers of CD3+, CD4+, and CD8+ were just marginally increased compared to baseline levels, with the CD4:CD8 T cell ratios unchanged. PHA responses were | [23]      |



|                          |                                                       |                 |                                                                                        |                                                                                  |           |                                   |                                                                                                                                                                                                            |      |
|--------------------------|-------------------------------------------------------|-----------------|----------------------------------------------------------------------------------------|----------------------------------------------------------------------------------|-----------|-----------------------------------|------------------------------------------------------------------------------------------------------------------------------------------------------------------------------------------------------------|------|
|                          |                                                       |                 |                                                                                        |                                                                                  |           |                                   | enhanced in most patients; and mean NK activity was increased compared to baselines.                                                                                                                       |      |
| <i>Ganoderma lucidum</i> | RCT                                                   | 68              | Karnofsky performance status, immunological parameters.                                | Extract, 600 mg thrice daily.                                                    | 12 weeks  | Lung cancer, advanced stage.      | A significant increase in Karnofsky scores compared to placebo. Less disease progression. In addition, several cancer-related symptoms and immune parameters were significantly improved in <i>verum</i> . | [24] |
| <i>Ganoderma lucidum</i> | RCT                                                   | 72              | HP such as hemoglobin %, RBC, WBC, conversion rate of lymphocytes, NK cell levels etc. | Oral administration of Wuse - Lingzhi – Jiaonang formulation during radiotherapy | -         | Nasopharyngeal cancer             | Administration of this mushroom along with radiotherapy could not reduce the side effects but in some extents improved a few immune function parameters.                                                   | [25] |
| <i>Ganoderma lucidum</i> | Controlled Clinical Trial                             | 198             | Size, site and macroscopic type of all adenomas.                                       | Extract, 1.5 g/d.                                                                | 12 months | Colorectal adenoma                | Decrease in both number and size of adenomas for the <i>verum</i> group.                                                                                                                                   | [26] |
| Lentinan                 | A multi-institutional randomized prospective protocol | -               | QOL                                                                                    | Patients administered lentinan, tegafur and cisplatin.                           | -         | Gastric cancer, advanced stage    | Lentinan could prolong survival and improved QOL of gastric cancer patients.                                                                                                                               | [27] |
| Lentinan                 | A multi-center clinical study                         | 80              | QOL                                                                                    | -                                                                                | -         | Colorectal cancer, advanced stage | A significant improvement in QOL scores after 12 weeks of treatment with lentinan.                                                                                                                         | [28] |
| Lentinan                 | Randomized controlled trial                           | 78 (136 tumors) | Parameters like survival duration, tumor necrosis and recurrence rate etc.             | 500 mg/d.                                                                        | 18 months | HCC                               | Administration of lentinan along with other therapy was advantageous to increase survival time as well as decrease chances of recurrence rate.                                                             | [29] |

|                                       |                      |                         |                                                                                        |                                                                                              |                                                    |                                                                                      |                                                                                                                                                                                                                                                                                                                    |      |
|---------------------------------------|----------------------|-------------------------|----------------------------------------------------------------------------------------|----------------------------------------------------------------------------------------------|----------------------------------------------------|--------------------------------------------------------------------------------------|--------------------------------------------------------------------------------------------------------------------------------------------------------------------------------------------------------------------------------------------------------------------------------------------------------------------|------|
| Lentinan                              | A multi-center study | 36 (out of 40 patients) | Rate of lentinan-binding cells in CD14+ monocytes.                                     | Supplementary food containing superfine dispersed lentinan (SDL).                            | 7 to 12 weeks                                      | HCC                                                                                  | Effective for survival of HCC patients.                                                                                                                                                                                                                                                                            | [30] |
| <i>Schizophyllum commune</i> Fr.: Fr. | Clinical trial       | 220                     | Tumor responses, time of recurrence survival, immunologic parameters and side effects. | Polysaccharide Schizophyllan (SPG): intramuscularly once or twice weekly (40 mg).            | Administration as long as possible till 18 months. | Cervical cancer, stage II or stage III who had been given irradiation, concomitantly | Tumor-reducing effect in patients for either stage. Time to recurrence was longer in in stage II but not stage III cancer, compared with control group. At 48-months survival time of patients with stage II but not stage III cancer in the SPG group was significantly longer than in the control group. groups. | [31] |
| <i>Trametes versicolor</i>            | Controlled trial     | 60                      | -                                                                                      | Orally administered Yunzhi glycopeptide, while the control group was treated with squalanol. | -                                                  | Gastric cancer                                                                       | Significant improved symptoms of Qi and Yin deficiency in patients after chemotherapy.                                                                                                                                                                                                                             | [32] |

(-) Data not available

**Table S3.** Clinical studies of mushroom form other databases (<https://www.clinicaltrials.gov/>).

| Scientific name          | Study design                  |                    |                |                       | Type of cancer/ Stage             | Outcome                                                                                                             | Identifier no. |
|--------------------------|-------------------------------|--------------------|----------------|-----------------------|-----------------------------------|---------------------------------------------------------------------------------------------------------------------|----------------|
|                          | Type of study                 | Number of patients | Dose           | Duration of treatment |                                   |                                                                                                                     |                |
| <i>Agaricus bisporus</i> | A randomized, phase II trial  | 132                | Variable dose. | 12 to 48 weeks        | Prostate cancer (multiple stages) | This study aims to determine if a white button supplement can reduce prostate-specific antigen. Not yet recruiting. | NCT04519879    |
| <i>Agaricus bisporus</i> | interventional clinical trial | 16                 | Variable dose. | 12 weeks              | Breast cancer                     | To determine the efficacy of white button, mushroom postmenopausal breast cancer                                    | NCT00709020    |

|                            |                                             |     |                                                                                                     |          |                                     |                                                                                                                                                                                                                 |             |
|----------------------------|---------------------------------------------|-----|-----------------------------------------------------------------------------------------------------|----------|-------------------------------------|-----------------------------------------------------------------------------------------------------------------------------------------------------------------------------------------------------------------|-------------|
|                            |                                             |     |                                                                                                     |          |                                     | survivors. Study completed but no results posted.                                                                                                                                                               |             |
| <i>Coriolus versicolor</i> | RCT pilot clinical study, phase IV          | 60  | 3.5 g/d.                                                                                            | 6 months | Breast cancer                       | To study the effects of Yunzhi extract as adjuvant in the treatment process. Study completed but no results posted.                                                                                             | NCT00647075 |
| <i>Grifola frondosa</i>    | A randomized, interventional clinical trial | 480 | Two tablets, twice a day.                                                                           | 42 days  | Lung neoplasms and breast carcinoma | To study the efficacy to treat lung neoplasms and breast carcinoma. Study completed but no results posted.                                                                                                      | NCT02603016 |
| <i>Trametes versicolor</i> | Clinical trial, phase I                     | 11  | Capsules, twice a day (3 g/d for first week), subsequently increasing dose every week up to 24 g/d. | -        | Breast cancer                       | To determine the maximum tolerated dose of the mushroom extract in women with stage I-III breast cancer, who have recently completed standard post-surgery radiotherapy. Study completed but no results posted. | NCT02568787 |

**Table S4:** Characteristics of studies related to anticancer property of mushroom(s), database source (<https://pubmed.ncbi.nlm.nih.gov/>)

| Scientific name [English name] | Extract/fraction/compound                                                                                                         | Type of cancer                                       | <i>In vitro</i> cell line/ <i>In vivo</i>            | Dose                                                        | Mechanism                                                                      | Reference |
|--------------------------------|-----------------------------------------------------------------------------------------------------------------------------------|------------------------------------------------------|------------------------------------------------------|-------------------------------------------------------------|--------------------------------------------------------------------------------|-----------|
| <i>Agaricus bisporus</i>       | Ethyl acetate fractions. Mostly encompass unsaturated fatty acids viz. linoleic acid, linolenic acid and conjugated linoleic acid | Breast cancer                                        | MCF-7aro (in vitro); female BALB/c <i>nu-nu</i>      | 100 mg/L.<br>100 µL of a 4× concentrated extract (in water) | Inhibited testosterone-induced cell proliferation                              | [33]      |
| <i>Agaricus bisporus</i>       | ABL                                                                                                                               | Colon cancer, breast cancer                          | HT29, MCF-7, Caco-2, Rama-27 rat mammary fibroblasts | 25 µg/mL                                                    | inhibits incorporation of [ <sup>3</sup> H]-thymidine into DNA                 | [34]      |
| <i>Agaricus bisporus</i>       | Lectin-like mannose-binding protein (orf239342)                                                                                   | Breast cancer                                        | MCF-7                                                | -                                                           | Exerted mannose inhibitable antiproliferative activity                         | [35]      |
| <i>Agaricus bisporus</i>       | Lectin                                                                                                                            | Changes in cell cycle and related signaling pathways | In vitro, hRPE1 and hRPE3                            | 20 or 90 µg/mL for 3 days                                   | Extract hypophosphorylated Akt, and as a result attenuates cell proliferation. | [36]      |
| <i>Agaricus blazei</i>         | Acidic RNA protein complex, FA-2-b-β                                                                                              | Chronic myeloid leukemia                             | CML K562 cells                                       | -                                                           | Anti-proliferative potency as well as pro-apoptotic effects.                   | [37]      |
| <i>Agaricus blazei</i>         | Agarol, an ergosterol                                                                                                             | Several type of cancer e.g. lung, gastric, tongue    | A549, MKN45, HSC-3, and HSC-4 human                  | -                                                           | Agarol induces caspase-independent apoptosis through a mitochondrial pathway.  | [38]      |

|                        |                                                                 |                   |                                                                                  |                                                                                                |                                                                                                                                            |      |
|------------------------|-----------------------------------------------------------------|-------------------|----------------------------------------------------------------------------------|------------------------------------------------------------------------------------------------|--------------------------------------------------------------------------------------------------------------------------------------------|------|
|                        |                                                                 |                   | carcinoma cell lines                                                             |                                                                                                |                                                                                                                                            |      |
| <i>Agaricus blazei</i> | Polysaccharide <i>Agaricus blazei</i> Murill (pAbM)             | Several tumors    | Toll-like receptor 2-deficient (TLR2 <sup>-/-</sup> ) and Wild-type C57BL/6 mice | 2 mg per mouse; equivalent to 100 mg/kg, for 4 weeks or control PBS ( <i>n</i> = 5 per group). | Anti-tumor effect of pAbM was dependent on Gr-1(+) CD11b(+) monocytes, but neither on CD8(+) T cells nor CD4(+) T cells.                   | [39] |
| <i>Agaricus blazei</i> | beta-(1-6)-D: -glucan                                           | Lung cancer       | Lewis lung cancer 3LL cells                                                      | -                                                                                              | β-glucan decreases pulmonary metastasis of 3LL cells                                                                                       | [40] |
| <i>Agaricus blazei</i> | Agaritrine, a hydrazine-containing compound                     | Leukemia cancer   | U937 cells                                                                       | 10μg/mL of agaritrine for 48h                                                                  | Agaritrine induces apoptosis via caspase activation through cytochrome c release from mitochondria.                                        | [41] |
| <i>Agaricus blazei</i> | Polysaccharides, pAbM                                           | Pancreatic cancer | RAW 264.7                                                                        | 500, 1000, and 2000 μg/mL                                                                      | pAbM regulates cell-mediated immunity                                                                                                      | [42] |
| <i>Agaricus blazei</i> | Polysaccharide-protein complex                                  | Several tumors    | Sarcoma 180 in mice, as well as other carcinomas                                 | 10 and 20 mg/kg/d x 10                                                                         | Macrophage activation and alterations of the C3 are essential for the induction of an antitumor effect.                                    | [43] |
| <i>Agaricus blazei</i> | Polysaccharide, LMPAB                                           | Hepatic cancer    | <i>In vivo</i> BALB/c mice; <i>in vitro</i> hepatic cancer cells, BEL-7402       | -                                                                                              | In the <i>in vivo</i> model, the mRNA and protein levels of vascular endothelial growth factor level in tumor tissues were down-regulated. | [44] |
| <i>Agaricus blazei</i> | A polysaccharide, α-(1→4)-glucan-β-(1→6)-glucan-protein complex | Tumor             | Sarcoma 180 mice, tumor growth                                                   | -                                                                                              | The glucan-protein complex polysaccharide showed significant antitumor effects.                                                            | [45] |

|                            |                                                          |                            |                                                                                              |                                                   |                                                                                                                                                                         |      |
|----------------------------|----------------------------------------------------------|----------------------------|----------------------------------------------------------------------------------------------|---------------------------------------------------|-------------------------------------------------------------------------------------------------------------------------------------------------------------------------|------|
| <i>Agaricus blazei</i>     | $\beta$ -glucan                                          | Hepatic cancer             | HepG2 cells                                                                                  | 50 $\mu$ g/mL $\beta$ -glucan                     | $\beta$ -glucan significantly suppressed the expression of the <i>ERCC5</i> gene. But no significant change was observed in the CASP9 transcript level.                 | [46] |
| <i>Agaricus blazei</i>     | <i>A. blazei</i> water extract with marine phospholipids | Colon cancer               | <i>In vivo</i> , sp2 tumor bearing BALB/c nu/nu mice (male);<br><i>In vitro</i> Caco-2 cells | 0.5 mg/mL (total administration 105 mg/mouse)     | <i>A. blazei</i> water extract with marine phospholipids is beneficial in myeloma sp2 therapy without any side effect.                                                  | [47] |
| <i>Agaricus blazei</i>     | Sodium pyroglutamate                                     | Lewis lung carcinoma (LLC) | Direct inhibition of angiogenesis induced by solid tumors                                    | -                                                 | Both antitumor and antimetastatic action may be linked to a decrease of immune response caused by the tumor growth and tumor-induced neovascularization.                | [48] |
| <i>Agaricus sylvaticus</i> | -                                                        | Walker 256 tumor           | 80 rats, divided into 4 groups.                                                              | Sacrifying was done after 12 days of treatment    | In Walker 256 tumor rats, extract is able to decrease anemia as well as significant progress on several biochemical parameters.                                         | [49] |
| <i>Amauroderma rude</i>    | -                                                        | Breast cancer              | <i>In vitro</i> , <i>in vivo</i>                                                             | Inhibit cancer cell survival and induce apoptosis | Effects of extract found with extensive cell death, (decreased proliferation rate, as indicated by Ki67 staining) as well as increased apoptosis (as indicated by TUNEL | [50] |

|                                                                    |                                |                 |                                                                             |             |                                                                                                                                                                                                                                      |      |
|--------------------------------------------------------------------|--------------------------------|-----------------|-----------------------------------------------------------------------------|-------------|--------------------------------------------------------------------------------------------------------------------------------------------------------------------------------------------------------------------------------------|------|
| <i>Antrodia cinnamomea</i><br>Chang & Chou (1995)<br>[AC mushroom] | -                              | Breast cancer   | <i>In vitro</i>                                                             | 20-80 µg/mL | staining), which may be due to suppression of c-myc expression.<br>AC mushroom extract suppressed the phosphorylation of ERK1/2, p38, and JNK1/2 as well as directed to a dose-dependent inhibition on NF-κB binding and activation. | [51] |
| <i>Antrodia cinnamomea</i>                                         | -                              | Breast cancer   | HER-2/ <i>neu</i> -overexpressing MDA-MB-453 and BT-474 cells               | -           | Apoptotic cell death (associated with sub-G1 accumulation), DNA fragmentation, mitochondrial dysfunction, cytochrome <i>c</i> release, caspase-3/-9 activation, PARP degradation, and Bcl-2/Bax dysregulation.                       | [52] |
| <i>Antrodia cinnamomea</i>                                         | Cordycepin and zhankuic acid A | Lung cancer     | Gelatin zymography assay, human lung adenocarcinoma CL1-0                   | -.          | Anti-migration action in human adenocarcinoma CL1-0 cells through the MAPK and PI3K/AKT signalling pathways.                                                                                                                         | [53] |
| <i>Antrodia cinnamomea</i>                                         | -                              | Cancer cachexia | <i>In vivo</i> muscle atrophy, mice (lung tumor-) treated with chemotherapy | -           | Extract has a protective effect due to attenuating muscle proteolysis, pro-inflammatory cytokine production, and anorexia, and activating IGF-1-                                                                                     | [54] |

|                            |                       |               |                                                                                    |   |                                                                                                                                                                                                                                        |      |
|----------------------------|-----------------------|---------------|------------------------------------------------------------------------------------|---|----------------------------------------------------------------------------------------------------------------------------------------------------------------------------------------------------------------------------------------|------|
|                            |                       |               |                                                                                    |   | dependent protein synthesis.                                                                                                                                                                                                           |      |
| <i>Antrodia cinnamomea</i> | -                     | Breast cancer | Apoptosis, in vitro, MCF-7 as well as tamoxifen-resistant MCF-7                    | - | Extract induces apoptosis and “suppresses the mRNA expression of <i>skp2</i> (S-phase kinase-associated protein 2) by increasing the expressions of miR-21-5p, miR-26-5p, and miR-30-5p in MCF-7 and tamoxifen-resistant MCF-7 cells”. | [55] |
| <i>Antrodia camphorata</i> | dehydroeburicoic acid | Anti-tumor    | HL 60 cells xenograft animal model                                                 | - | Reduction of tumor size and weight without hampering mouse body weight                                                                                                                                                                 | [56] |
| <i>Antrodia salmonea</i>   | -                     | Breast tumor  | MDA-MB-231-luciferase-injected nude mice                                           | - | “Both mitochondrial (caspase-9/caspase-3/PARP) and death-receptor (caspase-8/FasL/Fas) signaling pathways are involved in execution of apoptosis”.                                                                                     | [57] |
| <i>Antrodia salmonea</i>   | -                     | Breast tumor  | <i>In vitro</i> (MDA-MB-231), <i>in vivo</i> (an athymic nude mouse model).        | - | Administration of this mushroom, was effective by delaying the incidence of the tumor as well as reducing the growth.                                                                                                                  | [58] |
| <i>Antrodia salmonea</i>   | -                     | Breast tumor  | <i>In vitro</i> (MDA-MB-231), <i>in vivo</i> (BALB/c-nu mice), several immunofluo- | - | Histological analysis established that treatment with <i>A. salmonea</i> can reduce tumor metastasis and upregulated E-                                                                                                                | [59] |



|                          |                        |                |                                                                                                      |                 |                                                                                                                                                                                                                                                                             |      |
|--------------------------|------------------------|----------------|------------------------------------------------------------------------------------------------------|-----------------|-----------------------------------------------------------------------------------------------------------------------------------------------------------------------------------------------------------------------------------------------------------------------------|------|
|                          |                        |                | rescence assays,<br>Western<br>blotting, RT-<br>PCR, luciferase<br>activity and<br>wound<br>invasion |                 | cadherin expression in<br>biopsied lung tissues.                                                                                                                                                                                                                            |      |
| <i>Antrodia salmonea</i> | -                      | Ovarian cancer | <i>In vitro</i> (SKOV-<br>3 or A2780)                                                                | -               | Treated extract-induced<br>apoptosis “associated with<br>the suppression of human<br>epidermal growth factor<br>receptor-2 (HER-2/neu)<br>and phosphoinositide 3-<br>kinase (PI3K)-protein<br>kinase B (AKT) expression<br>in HER-2/neu<br>overexpressing SKOV-3<br>cells”. | [60] |
| <i>Antrodia salmonea</i> | -                      | Colon cancer   | <i>In vitro</i> (SW620,<br>HCT116, and<br>HT29)                                                      | -               | Treated extract induced<br>cytoprotective autophagy<br>and apoptosis through<br>extracellular signal-<br>regulated kinase (ERK)<br>signaling cascades.                                                                                                                      | [61] |
| <i>Amauroderma rude</i>  | Polysaccharide<br>F212 | Tumour growth  | <i>In vivo</i> ,<br>lymphocyte<br>proliferation                                                      |                 | Increased macrophage<br>metabolism, lymphocyte<br>proliferation, and antibody<br>production                                                                                                                                                                                 | [62] |
| <i>Amauroderma rude</i>  | Ergosterol             | Breast cancer  | Murine cancer<br>cell line B16,<br>MDA-MB-231                                                        | Different doses | “Ergosterol-mediated<br>suppression of breast<br>cancer cell viability<br>occurred through<br>apoptosis and that                                                                                                                                                            | [63] |

|                                                                                                                  |                                                                                                                   |                     |                                                                                                      |                                          |                                                                                                                                                                                                                             |      |
|------------------------------------------------------------------------------------------------------------------|-------------------------------------------------------------------------------------------------------------------|---------------------|------------------------------------------------------------------------------------------------------|------------------------------------------|-----------------------------------------------------------------------------------------------------------------------------------------------------------------------------------------------------------------------------|------|
| <i>Auricularia auricula-judae</i>                                                                                | $\beta$ -(1 $\rightarrow$ 3)-d-glucan                                                                             | Hepatoma cancer     | H22 tumor growth                                                                                     | 5 mg kg <sup>-1</sup>                    | ergosterol up-regulated expression of the tumor suppressor Foxo3"<br>The water-soluble glucan triggered cell apoptosis, shown by the activation of caspase 3/9 and down-regulated tumor angiogenesis factors VEGF and CD31. | [64] |
| <i>Cerrena unicolor</i>                                                                                          | -                                                                                                                 | Colon cancer        | HT-29 and epithelial cells CCD 841 CoTr                                                              | Concentration range of 25-200 $\mu$ g/mL | Extracts induced programmed cell death in HT-29 while less in CCD 841 CoTr, without substantially lowering levels of necrosis in both cell lines.                                                                           | [65] |
| <i>Cordyceps sinensis</i>                                                                                        | Ethyl acetate extract ergosterol (major constituent) and trace amount of cordycepin, adenosine and carbohydrates. | Several cancer type | <i>In vitro</i> ; MCF-7, HL-60 human promyelocytic leukemia, HepG2 and B16 melanoma in C57BL/6 mice. | 0.05 g/kg-d                              | Mycelium has strong anti-tumor activity.                                                                                                                                                                                    | [66] |
| <i>Coriolus versicolor</i> (L.) Quél. (1886); synonym <i>Trametes versicolor</i> (L.) Lloyd (1920) [Turkey tail] | -                                                                                                                 | Breast cancer       | T-47D, MCF-7, MDA-MB-231, BT-20                                                                      | -                                        | Extract has a strong dose-dependent effect by suppressing proliferation of the three breast tumor cell lines, possibly via apoptosis induction, differentially dependent                                                    | [67] |

|                                                                           |                                                                                   |                           |                                                                                           |                                                 |                                                                                                                                                                |      |
|---------------------------------------------------------------------------|-----------------------------------------------------------------------------------|---------------------------|-------------------------------------------------------------------------------------------|-------------------------------------------------|----------------------------------------------------------------------------------------------------------------------------------------------------------------|------|
| <i>Coriolus versicolor</i>                                                | -                                                                                 | Breast cancer             | Mouse mammary 4T1 carcinoma                                                               | -                                               | on p53 and Bcl-2 expression.<br>Extracts found to be effective as anti-tumor, anti-metastasis and immunomodulation agents, and could protect bone destruction. | [68] |
| <i>Cortinarius xiphidipus</i> ,<br>fruiting body of ectomycorrhizal fungi | Ten sterols were identified, most potent is ergosta-4, 6, 8(14), 22-tetraen-3-one | Several cancer type       | <i>In vitro</i> : Neuro-2a, Saos-2, MCF7 and LNCaP-C42                                    | -                                               | Sterols are potential source of anticancer agents.                                                                                                             | [69] |
| <i>Flammulina velutipes</i><br>(W.Curt.: Fr.) Singer                      | Proflamin (PRF), an acidic glycoprotein with molecular weight $13 \pm 4$ kDa      | Tumour                    | Immunomodulation and antitumor                                                            | Oral administration to mice (doses, 1–30 mg/kg) | Post-surgery treatment with a specific fraction EA6 can inhibit significantly the growth of tumor, mediated by CD4 <sup>+</sup> T cells.                       | [70] |
| <i>Flammulina velutipes</i>                                               | FIP-fve is a protein                                                              | Lund cancer               | <i>In vitro</i> , cell proliferation of A549                                              | -                                               | FIP-fve inhibits lung cancer cell migration via RacGAP1 and increase p53 expression, and downstream gene p21, on Western blot                                  | [71] |
| <i>Fuscoporia torulosa</i>                                                | One novel steroid and 10 known compounds including oleanonic acid                 | Brest and prostate cancer | <i>In vitro</i> , MCF-7 PC-3, Acetylcholinesterase (AChE) and butrylcholinesterase (BChE) | -                                               | Oleanonic acid, exhibited cytotoxic effects against MCF-7 and potent BChE inhibitory activity.                                                                 | [72] |

|                                                                                                      |                                                                                                |                        |                                                             |                               |                                                                                                                                                                                                                                                                                                                |      |
|------------------------------------------------------------------------------------------------------|------------------------------------------------------------------------------------------------|------------------------|-------------------------------------------------------------|-------------------------------|----------------------------------------------------------------------------------------------------------------------------------------------------------------------------------------------------------------------------------------------------------------------------------------------------------------|------|
| <i>Ganoderma lucidum</i>                                                                             | Polysaccharides                                                                                | Brain tumors           | Glioma-bearing rats                                         |                               | Significant improvements were observed with parameters such as serum interleukin-2, TNF- $\alpha$ , INF- $\gamma$ , as well as enhanced cytotoxic activity of NK and T cells, promoting the functional maturation of dendritic cells. This leads to prolonged survival of rats by inhibition of glioma growth. | [73] |
| <i>Ganoderma lucidum</i>                                                                             | Triterpenes                                                                                    | Prostate cancer        | Cell viability, migration, invasion and apoptosis in DU-145 | Dose, 2 mg/mL                 | Extract inhibits cell viability in a dose- and time-dependent manner by the regulation of matrix metalloproteases, as well as induced apoptosis of DU-145 cells.                                                                                                                                               | [74] |
| [ <i>Ganoderma lucidum</i> (Leyss. Ex Fr.) Karst.] and [ <i>Ganoderma sinense</i> Zhao, Xu et Zhang] | 12 active compounds, several known ones: ganoderic acid, kaemferol, genistein and ergosterol). | Hepatocellular sarcoma | <i>In vivo</i> and <i>in silico</i> study                   | Hepa1-6-bearing C57 BL/6 mice | Four hub target genes, (NR3C2, AR, ESR1 and PGR), might act as potential treatment markers in tumor.                                                                                                                                                                                                           | [75] |
| <i>Grifola frondosa</i>                                                                              | D-fraction                                                                                     | Breast cancer          | <i>In vitro</i> , MCF7                                      | Variable doses, 18-367 mg/mL  | D-fraction has pro-apoptotic activity, reducing cancer cell viability.                                                                                                                                                                                                                                         | [76] |
| <i>Inonotus obliquus</i>                                                                             | Eight triterpenoids                                                                            | Lung cancer            | Cell viability and apoptosis                                | -                             | Three compounds: $\beta$ -hydroxylanosta-8,24-dien-                                                                                                                                                                                                                                                            | [77] |

|                          |                                                                                                                                          |               |                                                                          |                                                                                                                                                                                                                                                                                                                                                                                                                                                                             |                                                                                                                  |      |
|--------------------------|------------------------------------------------------------------------------------------------------------------------------------------|---------------|--------------------------------------------------------------------------|-----------------------------------------------------------------------------------------------------------------------------------------------------------------------------------------------------------------------------------------------------------------------------------------------------------------------------------------------------------------------------------------------------------------------------------------------------------------------------|------------------------------------------------------------------------------------------------------------------|------|
|                          | including a novel one: 3 $\beta$ -hydroxy-5 $\alpha$ -lanosta-8,25-dien-21-oic acid (chagabusone A)                                      |               | in different doses on various cell lines: A549, H1264, H1299, and Calu-6 |                                                                                                                                                                                                                                                                                                                                                                                                                                                                             | 21-a, rametenolic acid and chagabusone A showed potent anticancer activity against lung cancer cell lines.       |      |
| <i>Inonotus obliquus</i> | Six compounds, 1-lanosterol, 2-3 $\beta$ -hydroxy-8,24-dien-21-al, 3-ergosterol, 4-inotodiol, 5-ergosterol peroxide, 6-trametenolic acid | Breast cancer | PC3 and MDA-MB-231                                                       | Variable doses<br>IC <sub>50</sub> against PC3 as follows: 9.82 $\pm$ 0.98 $\mu$ M for ergosterol, 38.19 $\pm$ 1.67 $\mu$ M for ergosterol peroxide, 63.71 $\pm$ 3.31 $\mu$ M for trametenolic acid, and 73.46 $\pm$ 0.64 $\mu$ M for 3b-hydroxy-8,24-dien-21-al.<br>IC <sub>50</sub> against MDA-MB-231 as follows: 3b-hydroxy-8,24-dien-21-al (36.50 $\pm$ 1.13 $\mu$ M), ergosterol peroxide (30.23 $\pm$ 3.24 $\mu$ M) and trametenolic acid (55.03 $\pm$ 5.40 $\mu$ M) | Two compounds ergosterol peroxide and trametenolic acid displayed cytotoxicity on both PC3 and MDA-MB-231 cells. | [78] |

|                                                                     |                                                      |               |                                                              |                                                                   |                                                                                                                                                                                                                                                              |      |
|---------------------------------------------------------------------|------------------------------------------------------|---------------|--------------------------------------------------------------|-------------------------------------------------------------------|--------------------------------------------------------------------------------------------------------------------------------------------------------------------------------------------------------------------------------------------------------------|------|
| <i>Lentinula edodes</i>                                             | <i>Lactripin-1</i> , apoptosis                       | Lung cancer   | <i>In vitro</i> , A549                                       | -                                                                 | Protein <i>Lactripin</i> can induce apoptosis in A549 cells.                                                                                                                                                                                                 | [79] |
| <i>Lentinula edodes</i>                                             | <i>Lactripin-13</i> domain, apoptosis                | Lung cancer   | <i>In vitro</i> , A549                                       | Cell viability and mode of cell death, 20 µg/mL                   | <i>Lactripin</i> 13 domain can induce apoptosis in A549 cells.                                                                                                                                                                                               | [80] |
| <i>Lentinus squarrosulus</i> Mont.                                  | Partially isolated peptides                          | Lung cancer   | <i>In vitro</i> : H460, H292 and H23 cells                   | -                                                                 | Both extracts and peptides showed apoptosis due to the reduction of anti-apoptotic Bcl-2 protein and up-regulation of BAX.                                                                                                                                   | [81] |
| <i>Lentinus squarrosulus</i>                                        | Partially isolated peptides                          | Lung cancer   | <i>In vitro</i> : H460, H292 and H23 cells                   |                                                                   | “Strong suppression on integrin-mediated survival was evidenced with the diminution of integrins and down-stream signals (p-FAK/FAK, p-Src/Src, p-Akt/Akt) consequence with alteration of p53, Bax, Bcl-2 and Mcl-1 in cisplatin-treated lung cancer cells”. | [82] |
| <i>Lepista inversa</i>                                              | Clitocine                                            | Tumor         | Murine cancer cell lines (3LL) and L1210-tumor-bearing mice. | -                                                                 | Clitocine showed antitumor activity with a significant increase in lifespan and a decrease in the development of ascites (3 mg/kg).                                                                                                                          | [83] |
| <i>Lignosus rhinocerotis</i> (Cooke) Ryvarden (tiger milk mushroom) | Shotgun proteomics and N-terminal protein sequencing | Breast cancer | <i>In vitro</i> , MCF7                                       | Fraction 5 (F5) shows two distinct bands with strong cytotoxicity | Phenylmethylsulfonyl fluoride, a specific serine protease inhibitor, inhibited the proteolytic activity. The other                                                                                                                                           | [84] |

|                              |                                                                                      |                            |                                     |                                                                                                 |                                                                                                                                                                                                                   |      |
|------------------------------|--------------------------------------------------------------------------------------|----------------------------|-------------------------------------|-------------------------------------------------------------------------------------------------|-------------------------------------------------------------------------------------------------------------------------------------------------------------------------------------------------------------------|------|
|                              |                                                                                      |                            |                                     | against MCF7<br>(IC <sub>50</sub> =3.00 ± 1.01<br>µg/mL)<br>IC <sub>50</sub> value of<br>3µg/mL | evidence is the cytotoxicity<br>and cytotoxicity of F5.                                                                                                                                                           |      |
| <i>Lignosus rhinocerotis</i> | F5                                                                                   | Breast cancer              | MCF7                                |                                                                                                 | Apoptosis induction may<br>involve a cross-talk<br>between the extrinsic and<br>intrinsic apoptotic<br>pathways with<br>upregulation of caspase-8<br>and -9 activities with a<br>remarkable decrease of<br>Bcl-2. | [85] |
| <i>Lignosus tigris</i>       | Lectins, serine<br>proteases, RNase<br>Gf29 and a<br>230NA<br>deoxyribonucle-<br>ase | Breast cancer              | MCF7-xenograft<br>tumor growth      | --                                                                                              | “Selective cytotoxicity via<br>induction of cellular<br>apoptosis by the activation<br>of extrinsic and intrinsic<br>signaling pathways”.                                                                         | [86] |
| <i>Marasmius oreades</i>     | Phenolics<br>(vanillic acid,<br>gallic acid,<br>ferulic acid, and<br>catechin)       | Colon and breast<br>cancer | HT-29, MCF-7,<br>and MDA-MB-<br>231 | -                                                                                               | Extract has moderate<br>anticancer effect on several<br>cancer cell lines.                                                                                                                                        | [87] |
| <i>Marasmius oreades</i>     | Four<br>chromatogram-<br>phic fractions                                              | Breast cancer              | MCF7                                | -                                                                                               | Affect the process of<br>tumorigenesis through the<br>direct blockage of NF-<br>kappa B activation at the<br>inhibitory protein kappa B<br>level.                                                                 | [88] |
| <i>Phellinus linteus</i>     | -                                                                                    | Breast cancer              | MDA-MB-231<br>cells                 | -                                                                                               | Extracts suppressed<br>invasive behavior of breast<br>cancer cells) by inhibiting<br>cell adhesion, migration                                                                                                     | [89] |

|                          |                |                 |                                                      |                                |                                                                                                                                                                                                                   |      |
|--------------------------|----------------|-----------------|------------------------------------------------------|--------------------------------|-------------------------------------------------------------------------------------------------------------------------------------------------------------------------------------------------------------------|------|
| <i>Phellinus linteus</i> | -              | Lung cancer     | Mouse and human lung cancer cells                    | -                              | and invasion (secretion of urokinase-plasminogen activator).<br>Extract regulates cell-cycle arrest and apoptosis (caspase inhibitor Z-VADfmk, DNA fragmentation, caspase activation, and loss of clonogenicity). | [90] |
| <i>Phellinus linteus</i> | Polysaccharide | Colon cancer    | HCT116 and HT29 cells                                | -                              | Extracts containing polysaccharide functions in two ways to achieve its lethal synergy with camptothecin 11 in both HCT116 and HT29 cells.                                                                        | [55] |
| <i>Phellinus linteus</i> | -              | Prostate cancer | PC3 or DU145 cells                                   | Apoptosis in athymic nude mice | <i>In vivo</i> study of the extract suggests that it can attenuate tumor growth, as well as cause tumor regression by inducing apoptosis.                                                                         | [91] |
| <i>Phellinus linteus</i> | -              | Liver cancer    | SCID CB-17 mice received a transplant of Hep3B cells | -                              | Finding suggest that successfully reduction in tumor size, was associated with increase in T cell IL-12, IFN- $\gamma$ . Other important factors with observed changes includes TNF- $\alpha$                     | [92] |



|                                       |                                                   |               |                                                              |                                              |                                                                                                                                                                                 |      |
|---------------------------------------|---------------------------------------------------|---------------|--------------------------------------------------------------|----------------------------------------------|---------------------------------------------------------------------------------------------------------------------------------------------------------------------------------|------|
|                                       |                                                   |               |                                                              |                                              | secretion; NK cell activity; and phagocytic ability.                                                                                                                            |      |
| <i>Phellinus rimosus</i> (Berk) Pilat | -                                                 | Breast cancer | Cell line MCF-7, ALB/c mouse model of MCF-7 tumor xenografts | -                                            | The purified protein acts as an immunoregulatory agent to indirectly inhibit malignant proliferation of tumors.                                                                 | [93] |
| <i>Pholiota nameko</i>                | Water-soluble protein (WSP), MW ~43 kDa           | Breast cancer | MCF7                                                         | -                                            | WSP inhibited the proliferation by inducing apoptosis. Other observed changes include cell cycle disruption and the loss of mitochondrial transmembrane potential.              | [94] |
| <i>Pleurotus abalones</i>             | Polysaccharide fraction (3.68×10 <sup>5</sup> Da) | Breast cancer | MCF-7                                                        | MCF-7 (IC <sub>50</sub> =193 µg/mL).         | Treatment causes apoptosis via a mitochondria-mediated pathway. In addition, cell cycle arrest was observed at the S phase and PAP-3 induced up-regulation of p53..             | [95] |
| <i>Pleurotus highking</i>             | Purified fraction-III (PEF-III)                   | Breast cancer | MDA-MB-231 and HCC-1937                                      | Antiproliferative and antimetastatic effects | The antiproliferative and antimigratory effects of PEF-III occur by suppressing Akt signaling. Further, PEF-III significantly decreased the mRNA expression of Ki-67 and MMP-9. | [96] |
| <i>Pleurotus highking</i>             | PEF-III                                           | Breast cancer | MCF-7                                                        | Apoptosis                                    | PEF-III has promising anticancer activity, because                                                                                                                              | [97] |

|                              |                          |                         |                                                                    |                                                  |                                                                                                                                                                                                                                                                |       |
|------------------------------|--------------------------|-------------------------|--------------------------------------------------------------------|--------------------------------------------------|----------------------------------------------------------------------------------------------------------------------------------------------------------------------------------------------------------------------------------------------------------------|-------|
| <i>Pleurotus nebrodensis</i> | Purified polysaccharides | Several cancer cells    | Sarcoma 180 and numerous cell lines (HT-29, NIH3T3, and RAW 264.7) | Mouse sarcoma 180, immunopotentiating properties | of induction of apoptosis by a shift in the balance of proapoptotic and antiapoptotic genes. Finding suggest that polysaccharides from this mushroom have a potent anticancer effect.                                                                          | [98]  |
| <i>Pleurotus nebrodensis</i> | Purified polysaccharides | Lung cancer             | MRC-5 and A549                                                     | A549, apoptosis                                  | Purified polysaccharide can inhibit A549 cell proliferation and induce apoptosis primarily via activating the intrinsic mitochondrial pathway.                                                                                                                 | [99]  |
| <i>Pleurotus ostreatus</i>   | -                        | Breast and colon cancer | MCF-7 and HT-29 cells                                              | Tumour                                           | Antitumor effect by inducing the expression of the tumor suppressor p53 and the cyclin-dependent kinase inhibitor p21 (CIP1/WAF1), but at the same time inhibiting the phosphorylation of retinoblastoma protein (Rb) in breast and colon cells, respectively. | [100] |
| <i>Pleurotus ostreatus</i>   | -                        | Blood cancer            | KG-1                                                               | Hyperthermia                                     | Extract induces apoptosis in KG-1 cells. This comparative study also observed anticancer effects are significantly increased                                                                                                                                   | [101] |

|                                                                                               |                                                                   |                          |                                                                         |                                                                               |                                                                                                                                                                                                                       |       |
|-----------------------------------------------------------------------------------------------|-------------------------------------------------------------------|--------------------------|-------------------------------------------------------------------------|-------------------------------------------------------------------------------|-----------------------------------------------------------------------------------------------------------------------------------------------------------------------------------------------------------------------|-------|
| <i>Poria cocos</i><br>F.A.Wolf, Synonym-:<br><i>Wolfiporia extensa</i><br>(Peck) Ginns (1984) | $\beta$ -glucan PCM3-II                                           | Breast cancer            | MCF-7                                                                   | Immune-enhancing and anti-tumor activities                                    | when combined with<br>thermotherapy.<br>PCM3-II induced cell-cycle arrest time-dependently at G1 phase, which was associated with downregulation of the unscheduled cyclin D1 and cyclin E expression in MCF-7 cells. | [102] |
| <i>Cerrena unicolor</i> (CU)<br>and <i>Pycnoporus sanguineus</i> (PS)                         | -                                                                 | Colon cancer             | <i>In vitro</i> (HT-29, LS 180, and SW948).                             | Chemo-preventive activity of bioactive fungal fractions                       | PS4-II exerted a milder effect on normal CCD 841 CoTr cells than CU1-II                                                                                                                                               | [103] |
| <i>Ramaria flava</i>                                                                          | -                                                                 | Tumor                    | <i>In vitro</i> : several cell lines including MDA-MB-231               | MTT assay                                                                     | Strong antitumor activity against MDA-MB-231 (IC <sub>50</sub> = 66.54 $\mu$ g/mL.                                                                                                                                    | [104] |
| <i>Russula alatoreticula</i>                                                                  | Phenolic compounds (pyrogallol > cinnamic acid > p-coumaric acid) | Hepatocellular carcinoma | Anticancer property, apoptosis                                          | Hep3B cell (IC <sub>50</sub> 358.57 $\mu$ g/mL)                               | Showed morphological changes, cell cycle arrest, depleting MMP and alleviating ROS through Bax, Bcl2, caspases 3 and 9 intrinsic mitochondrial pathway.                                                               | [105] |
| <i>Schizophyllum commune</i>                                                                  | Schizophyllan, a $\beta$ -D-glucan                                | Breast and liver cancer  | Mouse survival, tumor incidence, histopathology, estrogen receptor (ER) | Schizophyllan and tamoxifen reduced the incidence of mammary tumors by 85 and | In both mammary and hepatic carcinomas, tamoxifen was more effective than schizophyllan by the induction of apoptosis.                                                                                                | [106] |

|                                                                                                                                                                                                                                                         |                                                         |                                  |                                                                     |                     |                                                                                                                                                                                        |       |
|---------------------------------------------------------------------------------------------------------------------------------------------------------------------------------------------------------------------------------------------------------|---------------------------------------------------------|----------------------------------|---------------------------------------------------------------------|---------------------|----------------------------------------------------------------------------------------------------------------------------------------------------------------------------------------|-------|
|                                                                                                                                                                                                                                                         |                                                         |                                  | expression, cell proliferation, apoptosis and caspase-3 expression. | 75 %, respectively. |                                                                                                                                                                                        |       |
| <i>Thelephora aurantiotincta</i>                                                                                                                                                                                                                        | p-terphenyl derivative, thelephantin O, and vialinin A  | Hepatocellular carcinoma         | HepG2 and Caco2                                                     | -                   | Ethanol extract has selective cytotoxic agents against cancer cells.                                                                                                                   | [107] |
| <i>Taiwanofungus salmoneus</i>                                                                                                                                                                                                                          | Total phenols, flavonoids, and ergothioneine            | Colorectal cancer                | Hep-1 and Caco-2                                                    |                     | Extracts exhibited better apoptotic effects on Sk-Hep-1 and Caco-2 cells than sorafenib and celecoxib.                                                                                 | [108] |
| <i>Tricholoma mongolicum</i>                                                                                                                                                                                                                            | A 66-kDa laccase                                        | Hepatocellular and breast cancer | HepG2 and MCF7                                                      | Antiproliferative   | Potent antipathogenic protein effective against MCF7 (IC <sub>50</sub> = 4.2 µM).                                                                                                      | [109] |
| <i>Xylaria schweinitzii</i>                                                                                                                                                                                                                             | Schweinitzins A and (S)-torosachrysone-8-O-methyl ether | Several type of cancer cells     | KB, MCF7, SK-LU-I and HepG2                                         | -                   | Methanolic extract of <i>X. schweinitzii</i> fruiting bodies and its two major constituents Schweinitzins A and (S)-torosachrysone-8-O-methyl ether showed potent anticancer activity. | [110] |
| MycoPhyto® Complex (MC), <i>Agaricus blazei</i> , <i>Cordyceps sinensis</i> , <i>Coriolus versicolor</i> , <i>Ganoderma lucidum</i> , <i>Grifola frondosa</i> and <i>Polyporus umbellatus</i> , and β-1,3-glucan from <i>Saccharomyces cerevisiae</i> . | -                                                       | Breast cancer                    | Antiproliferative                                                   |                     | Mixture of mushroom mycelia, has cytostatic effects by the inhibition of cell proliferation as well as arresting cell cycle.                                                           | [111] |

**Table S5:** Summary of active constituents of mushroom(s) and their mechanism of action

| Active constituents                                                                                                       | Name of the mushroom     | Type of cancer                                | Observation                                                                       | Mechanism of action                                                                                                              | Reference |
|---------------------------------------------------------------------------------------------------------------------------|--------------------------|-----------------------------------------------|-----------------------------------------------------------------------------------|----------------------------------------------------------------------------------------------------------------------------------|-----------|
| Beta-(1-3)-glucan                                                                                                         | <i>Agaricus bisporus</i> | Breast cancer and sarcoma 180-bearing mice    | Significantly increased the thymus index and stimulated splenocyte proliferation. | Antitumor activity is related with up-regulation of NK cells activity and expression of IFN- $\gamma$ in spleen.                 | [44]      |
| Ergosterol                                                                                                                | <i>Agaricus blazei</i>   | Sarcoma 180-bearing mice, female C57BL/6 mice | Solid tumor (angiogenesis induced direct inhibition)                              | Ergosterol inhibited the Matrigel-induced neovascularization                                                                     | [112]     |
| Fraction containing (1-->4)-alpha-D-glucan and (1->6)-beta-D-glucan branching, compound is HM3-G (molecular mass 380 kDa) | <i>Agaricus blazei</i>   | Double-grafted tumor system in Balb/c mice    | Inhibits tumor cell growth <i>in vitro</i> with selective cytotoxicity.           | Increasing expression of the Apo2.7 antigen observed on the mitochondrial membranes, so as to induce apoptotic processing        | [113]     |
| Fraction-3 (LM-3), containing alpha-1,4-glucan-beta-1,6-glucan complex with an average molecular weight of 20 kDa         | <i>Agaricus blazei</i>   | MethA tumor cell growth                       | <i>In vitro</i> , selective cytotoxicity                                          | Authors predict that the inhibition of the distant tumor may be due to the migration of granulocytes, at the primary tumor site. | [114]     |
| (1,6)- $\beta$ - D-polyglucose, with an average molecular weight of 10 kDa                                                | <i>Agaricus blazei</i>   | Mouse tumor                                   | Remarkable tumor regression observed.                                             | -                                                                                                                                | [115]     |

|                                                                |                            |                                                           |                                                                                            |                                                                                                                                                                         |       |
|----------------------------------------------------------------|----------------------------|-----------------------------------------------------------|--------------------------------------------------------------------------------------------|-------------------------------------------------------------------------------------------------------------------------------------------------------------------------|-------|
| Antrocin                                                       | <i>Antrodia camphorata</i> | Breast cancer                                             | Apoptosis observed with antrocin treatment in MDA-MB-231 cells, (IC <sub>50</sub> =0.6 µM) | Cleavage of caspase-3 and poly (ADP-ribose) polymerase.                                                                                                                 | [116] |
| Antrocin                                                       | <i>Antrodia camphorata</i> | Breast cancer                                             | MCF-7 and MDA-MB-231, immunomodulatory effects                                             | Transcriptional activation of p53, as established by the fact that ATA failed to induce miR-200c or suppress ZEB1 activity in p53-inhibited cells.                      | [117] |
| Polysaccharide peptides (PSP)                                  | <i>Coriolus versicolor</i> | Breast cancer                                             | MCF-7, immunomodulatory effects                                                            | Polysaccharide peptides exert significant proliferative response of blood lymphocytes, related with IL-6 and IL-1β mRNA upregulation.                                   | [118] |
| Cordycepin (3'-deoxyadenosine)                                 | <i>Cordyceps sinensis</i>  | Lung cancer                                               | B16-F1 mouse melanoma cells, hematogenic metastasis                                        | Via blocking of ADP-induced platelet aggregation in mouse model.                                                                                                        | [119] |
| Cordycepin                                                     | <i>Cordyceps sinensis</i>  | Lung cancer                                               | Cell line H1975, apoptosis                                                                 | Cordycepin inhibits cell proliferation and induces apoptosis via the EGFR signalling pathway.                                                                           | [120] |
| Cordycepin                                                     | <i>Cordyceps sinensis</i>  | Lung cancer                                               | NSCLC, apoptosis                                                                           | Cordycepin is capable of inhibiting NSCLC cell cycle progression as well as inducing apoptosis by interacting with AMP-activated protein kinase (AMPK).                 | [121] |
| Cordycepin                                                     | <i>Cordyceps sinensis</i>  | Testicular cancer                                         | MA-10 mouse Leydig tumor cells, cell cycle inhibition                                      | Cordycepin inhibited FGF9-induced testicular tumor growth by suppressing the ERK1/2, Rb/E2F1, expressions of FGFR1-4 proteins and interfering with cell cycle pathways. | [122] |
| Ergosterol, 5,6-dehydroergosterol and ergosterol peroxide (EP) | <i>Ganoderma lucidum</i>   | Inflammatory breast cancers (IBC) and other human cancers | <i>In vitro</i> , apoptosis                                                                | EP shows anti-proliferative effects via arresting G1 phase cell cycle, induced apoptosis via caspase 3/7                                                                | [123] |

|                   |                          |                                           |                                                                 |                                                                                                                                                                 |       |
|-------------------|--------------------------|-------------------------------------------|-----------------------------------------------------------------|-----------------------------------------------------------------------------------------------------------------------------------------------------------------|-------|
|                   |                          | cell types (solid and blood malignancies) |                                                                 | activation, and PARP cleavage. In addition, EP has invasive effects by inhibiting the expression of total AKT1, AKT2, BCL-XL, Cyclin D1 and c-Myc in IBC cells. |       |
| Ganoderic acid DM | <i>Ganoderma lucidum</i> | Breast cancer                             | <i>In vitro</i> , MCF-7 cell proliferation and colony formation | Ganoderic acid induces apoptosis (as observed by DNA fragmentation and cleavage of PARP), as well as decreases the mitochondrial membrane potential.            | [124] |

|                              |                          |                                                                       |                                                                                       |                                                                                                                                                                                                                                   |       |
|------------------------------|--------------------------|-----------------------------------------------------------------------|---------------------------------------------------------------------------------------|-----------------------------------------------------------------------------------------------------------------------------------------------------------------------------------------------------------------------------------|-------|
| Ganoderic acid               | <i>Ganoderma lucidum</i> | Breast cancer                                                         | <i>In vitro</i> and <i>in vivo</i> , MDA-MB-231, angiogenesis, invasion and apoptosis | Extract induced apoptosis (via suppressing NF-κB activity and the expression profile of its downstream genes), and inhibited proliferation, angiogenesis, invasion .                                                              | [125] |
| Ganoderic acid A             | <i>Ganoderma lucidum</i> | Breast cancer                                                         | <i>In vitro</i> , MDA-MB-231, pro-apoptotic function, antineoplastic effect           | Extract has effects inhibiting cell viability via JAK2/STAT3 downregulation.                                                                                                                                                      | [126] |
| D-Fraction                   | <i>Grifola frondosa</i>  | Tumor-bearing mice                                                    | <i>In vivo</i> , enhancement of several immune responses                              | Suppresses progress of tumor, as well as delays the metastatic progress and enhances several immune responses via activation of macrophage, NK and T cells.                                                                       | [127] |
| β-glucan                     | <i>Grifola frondosa</i>  | Tumors in a murine model                                              | Tumor regression                                                                      | Soluble β-glucan maitake D-fraction, and cytosine-phosphate-guanine oligodeoxynucleotide synergistically activated dendritic cells (increased the expression of dendritic cell maturation markers and interleukin-12 production). | [128] |
| D-Fraction, a polysaccharide | <i>Grifola frondosa</i>  | MM-46 mammary tumor-bearing C3H/HeJ mice                              | Cytotoxicity against NK-sensitive YAC-1 cells and the expression of CD223             | D-Fraction improves toxicity, with production of IL-12 by macrophages.                                                                                                                                                            | [129] |
| α-glucan                     | <i>Grifola frondosa</i>  | CT-26 tumor-bearing BALB/c mice and B16 melanoma-bearing C57BL/6 mice | Improvements of immunological parameters                                              | Increased cell proliferation along with increased IFN-γ production by allogeneic CD4 <sup>+</sup> and CD8 <sup>+</sup> T cells                                                                                                    | [130] |



|                             |                          |                                     |                                                                                |                                                                                                                                                                                                                                  |       |
|-----------------------------|--------------------------|-------------------------------------|--------------------------------------------------------------------------------|----------------------------------------------------------------------------------------------------------------------------------------------------------------------------------------------------------------------------------|-------|
| $\alpha$ -glucan            | <i>Grifola frondosa</i>  | Colon-26 carcinoma and B16 melanoma | Improvements of immunological parameters                                       | In the spleen, enhanced immune response by increasing INF- $\gamma$ -expressing CD4+ and CD8+ cells while INF- $\gamma$ -expressing CD8+ cells in the tumor lymph nodes. Might be a candidate for immunotherapy against cancer.  | [131] |
| $\beta$ -glucan             | <i>Grifola frondosa</i>  | Tumors in a murine model            | Improvements of immunological parameters                                       | Decrease in the number of immunosuppressive cells (responsible for tumor), increase in the number of infiltrations activated T cells (responsible for tumor), and induction of specific T-cell response (antigen-specific tumor) | [132] |
| $\beta$ -(1,3) (1,6)-glucan | <i>Grifola frondosa</i>  | Murine resident macrophages         | Improvements of immunological parameters                                       | Soluble $\beta$ -glucans induce cell proliferation and cytokine production (through Dectin-1-independent ERK and p38 MAPK activation).                                                                                           | [133] |
| Heteropolysaccharide        | <i>Grifola frondosa</i>  | BALB/c mice                         | Induced both therapeutic and preventive effects on colon-26 tumor development. | Could be a potential effective adjuvant to enhance immunotherapy using DC-based vaccination.                                                                                                                                     | [134] |
| D-Fraction                  | <i>Grifola frondosa</i>  | MM46-bearing C3H/HeN mice           | Suppression of tumor growth.                                                   | D-fraction treatment increased TNF- $\alpha$ and IFN- $\gamma$ (spleen cells) as well as TNF- $\alpha$ expression in NK cells.                                                                                                   | [135] |
| Ergosterol peroxide         | <i>Inonotus obliquus</i> | Human colorectal cancer             | CRC cell lines, anti-proliferative and pro-apoptotic activities                | Ergosterol peroxide effectively inhibits colitis-associated colon cancer in AOM/DSS-treated mice. In CRC cells, it down-regulated $\beta$ -catenin signalling.                                                                   | [136] |

|                                                                                                                                                                                                              |                              |                                                                                                  |                                                                                                                               |                                                                                                                           |           |
|--------------------------------------------------------------------------------------------------------------------------------------------------------------------------------------------------------------|------------------------------|--------------------------------------------------------------------------------------------------|-------------------------------------------------------------------------------------------------------------------------------|---------------------------------------------------------------------------------------------------------------------------|-----------|
| Eburicoic acid                                                                                                                                                                                               | <i>Laetiporus sulphureus</i> | Human cancer cell lines (HL-60, SMMC-721, A-549, MCF-7, SW-480)                                  | Exhibited moderate cytotoxicity, IC <sub>50</sub> S, HL-60=37.5 µM, SMMC-721 = 14.8 µM, A-549 = 15.6 µM, and SW-480 =36.1 µM. | -                                                                                                                         | [137]     |
| Two mannogalactoglucan-type polysaccharides (WPLE-N-2 and WPLE-A0.5-2)                                                                                                                                       | <i>Lentinus edodes</i>       | Sarcoma 180 (S-180)-bearing mice                                                                 | <i>In vivo</i> , immunomodulating effects.                                                                                    | β-linkages plays a key role for the antitumor and immunomodulating effects.                                               | [138]     |
| (1→6)-, (1→4)- and (1→3)-linked β-D-glucopyranosyl residues, (1→6)-linked α-D-galactopyranosyl residues, (1→3,6)- and (1→2,4)-linked α-D-mannopyranosyl residues and terminal residues of β-D-glucopyranosyl | <i>Lentinus edodes</i>       | Sarcoma 180 (S-180)-bearing mice                                                                 | <i>In vivo</i> and <i>in vitro</i> (carcinoma HCT-116 and HT-29 cells)                                                        | Antitumor bioactivities implanted in Kunming mice.                                                                        | [139]     |
| Panepoxydone [(1S,5R,6S)-5-hydroxy-3-[(1S)-1-hydroxy-3-methylbut-2-enyl]-7-oxabicyclo [4.1.0] hept-3-en-2-one]                                                                                               | <i>Lentinus crinitus</i>     | Breast and several other cancer, MCF-7 and TNBC cell lines MDA-MB-231, MDA-MB-468 and MDA-MB-453 | Apoptosis and EMT-related proteins expression                                                                                 | Panepoxydone inhibits the NF-kappaB- activated expression of the SEAP                                                     | [140,141] |
| 6-Methylheptane-1,2,3,4,5-pentaol, and five ergostanoids                                                                                                                                                     | <i>Lentinus polychrous</i>   | Breast cancer                                                                                    | T47D cells, cell proliferation                                                                                                | Compound exhibited oppressive effect on oestradiol-enhanced cell proliferation while no oestrogenic activity is observed. | [142]     |
| Polysaccharides                                                                                                                                                                                              | <i>Phellinus linteus</i>     | Colon cancer                                                                                     | Athymic nude mouse SW480 tumor engraft model, cell proliferation                                                              | Extract (125-1000 µg/mL) inhibited cell proliferation as well as β-catenin expression.                                    | [143]     |

|                                                                                                                                            |                                  |                                                                            |                                                                                                                               |                                                                                                                                                                                                         |       |
|--------------------------------------------------------------------------------------------------------------------------------------------|----------------------------------|----------------------------------------------------------------------------|-------------------------------------------------------------------------------------------------------------------------------|---------------------------------------------------------------------------------------------------------------------------------------------------------------------------------------------------------|-------|
| Polysaccharides (backbone is $\alpha$ -D-Glc(1→4)- $\alpha$ -D-Glc(1→6) units)                                                             | <i>Phellinus linteus</i>         | Tumor                                                                      | S-180 sarcoma cells, anti-proliferative effect                                                                                | Polysaccharide has strong anti-proliferative effect via apoptosis.                                                                                                                                      | [144] |
| Hispolon                                                                                                                                   | <i>Phellinus linteus</i>         | Breast and bladder cancer                                                  | MCF7, T24 and J8                                                                                                              | Hispolon is effective in breast and bladder cancers and downregulates MDM2 via MDM2-recruited activated ERK1/2. Also, hispolon-induced caspase-7 cleavage was inhibited by the ERK1/2 inhibitor, U0126. | [145] |
| Lectin                                                                                                                                     | <i>Pholiota adiposa</i>          | Breast cancer                                                              | MCF7 and Hep G2 cells, antiproliferative                                                                                      | Antiproliferative activity against Hep G2 cells (2.1 $\mu$ M) and MCF7 cells (3.2 $\mu$ M)                                                                                                              | [146] |
| 1- 4 [D-mannitol (C1), ergosta-5,7,22-trien-3 $\beta$ -ol (C2), 5,8- epidioxy-ergosta-6-22-dien-3 $\beta$ -ol (C3), and palmitic acid (C4) | <i>Pleurotus djamor</i>          | Breast cancer                                                              | MDA-MD-231, cytotoxicity                                                                                                      | The compound 5,8- epidioxy-ergosta-6-22-dien-3 $\beta$ -ol exhibited better cytotoxic activity than ergosta-5,7,22-trien-3 $\beta$ -ol .                                                                | [147] |
| ergosta-5,7,22-trien-3 $\beta$ -ol (major constituent)                                                                                     | <i>Pleurotus sajor-caju</i>      | Colorectal cancer, HTC116- <sup>p53</sup> and HTC116- <sup>Bax</sup> cells | <i>In vitro</i> (HTC116- <sup>p53</sup> and HTC116- <sup>Bax</sup> cells), apoptosis-promoting and cell cycle-arrest pathways | p21/p53 cell cycle regulation pathway is probably disrupted by compounds present in hexane extract.                                                                                                     | [148] |
| 5 $\alpha$ ,8 $\alpha$ -Epidioxy-22E-ergosta-6, 22-dien-3 $\beta$ -ol (ergosterol peroxide)                                                | <i>Sarcodon aspratus</i>         | Human colorectal cancer, HT29                                              | Suppression of LPS-induced DNA binding activity and phosphorylation inhibition of ERK MAPKs                                   | Ergosterol peroxide suppresses LPS-induced inflammatory responses by inhibiting NF-kappaB and C/EBP $\beta$ transcriptional activity.                                                                   | [149] |
| 2',3'-dihydroxy-p-terphenyl derivative, thelephantin O                                                                                     | <i>Thelephora aurantiotincta</i> | Hepatocellular carcinoma cells                                             | Proliferation suppression via iron chelation                                                                                  | Fe <sup>++</sup> chelation occurs upstream in the pivotal pathway of 2',3'-dihydroxy-p-terphenyl-induced inhibition of hepatocellular carcinoma cell proliferation.                                     | [150] |

|                    |                              |                       |                                                                                                                               |                                                                                                                                                                                                                                                                          |        |
|--------------------|------------------------------|-----------------------|-------------------------------------------------------------------------------------------------------------------------------|--------------------------------------------------------------------------------------------------------------------------------------------------------------------------------------------------------------------------------------------------------------------------|--------|
| Lectin             | <i>Tricholoma mongolicum</i> | Sarcoma cancer tumour | TML-1 and TML-2 inhibit the growth of implanted sarcoma 180 cells.                                                            | In a mouse model both lectins stimulated the production of nitrite ions and activated macrophages.                                                                                                                                                                       | [151]  |
| Pachymic acid (PA) | <i>Poria cocos</i>           | Bladder cancer        | Apoptosis, chromatin condensation and DNA fragmentation                                                                       | A lanostane-type triterpenoid, PA, activates Bid and induces the loss of mitochondrial membrane potential ( $\Delta\Psi_m$ ) with up-regulated pro-apoptotic proteins (Bax and Bad), down-regulated anti-apoptotic proteins (Bcl-2 and Bcl-xL) and cytochrome c release. | [152]  |
| Pachymic acid      | <i>Poria cocos</i>           | Lung cancer           | PA induces apoptosis (NCI-H23 and NCI-H460)                                                                                   | PA revealed anti-tumor effects <i>in vitro</i> accompanied by induction of G2/M phase arrest and apoptosis through activation of the JNK and ER stress pathways in human lung cancer cells.                                                                              | [153]  |
| Pachymic acid      | <i>Poria cocos</i>           | Breast cancer         | <i>In vitro</i> and <i>in vivo</i> anticancer activity, MDA-MB-231 (IC <sub>50</sub> value, $2.13 \pm 0.24 \mu\text{g/mL}$ ). | PA has anticancer activity, that could inhibit tumour development via induction of cell apoptosis and G <sub>0</sub> /G <sub>1</sub> cell cycle arrest.                                                                                                                  | [154]. |

(-) Data not available

### Abbreviations

AE- Adverse event

AHCC®-Active hexose correlated compound

FFLZ-Fucose-containing fraction of *G. lucidum*

HCC-Hepatocellular carcinoma

HP- Hematologic parameters

IC<sub>50</sub>- Half-maximal inhibitory concentration

LOA-Loss of appetite

MDS-Myelodys plastic syndromes

MM- Medicinal mushrooms

OS- Overall survival

QOL-Quality of life

RCT- Randomized, placebo-controlled, double-blind clinical trial

ROS-Reactive oxygen species

SDL-Superfine dispersed lentinan

SPG-Polysaccharide Schizophyllan

## References

1. Twardowski, P.; Kanaya, N.; Frankel, P.; Synold, T.; Ruel, C.; Pal, S.K.; Junqueira, M.; Prajapati, M.; Moore, T.; Tryon, P.; Chen, S. A phase I trial of mushroom powder in patients with biochemically recurrent prostate cancer: Roles of cytokines and myeloid-derived suppressor cells for *Agaricus bisporus*-induced prostate-specific antigen responses. *Cancer* **2015**, *121*, 2942–2950, doi:10.1002/cncr.29421.
2. Ahn, W.S.; Kim, D.J.; Chae, G.T.; Lee, J.M.; Bae, S.M.; Sin, J.I.; Kim, Y.W.; Namkoong, S.E.; Lee, I.P. Natural killer cell activity and quality of life were improved by consumption of a mushroom extract, *Agaricus blazei* Murill Kyowa, in gynecological cancer patients undergoing chemotherapy. *Int. J. Gynecol. Cancer* **2004**, *14*, 589–594, doi:10.1111/j.1048-891X.2004.14403.x.
3. Grinde, B.; Hetland, G.; Johnson, E. Effects on gene expression and viral load of a medicinal extract from *Agaricus blazei* in patients with chronic hepatitis C infection. *Int. Immunopharmacol.* **2006**, *6*, 1311–1314, doi:10.1016/j.intimp.2006.04.005.
4. Tangen, J.-M.; Tierens, A.; Caers, J.; Binsfeld, M.; Olstad, O.K.; Trøseid, A.-M.S.; Wang, J.; Tjønnfjord, G.E.; Hetland, G. Clinical Study Immunomodulatory Effects of the *Agaricus blazei* Murrill-Based Mushroom Extract AndoSan in Patients with Multiple Myeloma Undergoing High Dose Chemotherapy and Autologous Stem Cell Transplantation: A Randomized, Double Blinded Clinical Study. **2015**, doi:10.1155/2015/718539.
5. Fortes, R.C.; Lacorte Recôva, V.; Melo, A.L.; Carvalho, R.; Novaes, G.; De Vida, C. Life quality of postsurgical patients with colorectal cancer after supplemented diet with agaricus sylvaticus fungus. *Nutr Hosp* **2010**, *25*, 586–596, doi:10.3305/nh.2010.25.4.4473.
6. Fortes, R.C.; Novaes, M.R.C.G.; Recôva, V.L.; Melo, A.L. Immunological, hematological, and glycemia effects of dietary supplementation with *Agaricus sylvaticus* on patients' colorectal cancer. *Exp. Biol. Med.* **2009**, *234*, 53–62, doi:10.3181/0806-RM-193.
7. Fortes, R.C.; Novaes, M.R.C.G.. The effects of *Agaricus sylvaticus* fungi dietary supplementation on the metabolism and blood pressure of patients with colorectal cancer during post surgical phase. *Nutr. Hosp.* **2011**, *26*, 176–86.
8. Fortes, R.C.; Recôva, V.L.; Melo, A.L.; Novaes, M.R.C.G. Effects of dietary supplementation with medicinal fungus in fasting glycemia levels of patients with colorectal cancer: A randomized, double-blind, placebo-controlled clinical study. *Nutr. Hosp.* **2008**, *23*, 591–598, doi:10.3305/nutr.
9. Valadares, F.; Novaes, M.R.C.G.; Cañete, R. Effect of *Agaricus sylvaticus* supplementation on nutritional status and adverse events of chemotherapy of breast cancer: A randomized, placebo-controlled, double-blind clinical trial. *Indian J. Pharmacol.* **2013**, *45*, 217–222, doi:10.4103/0253-7613.111894.
10. Tsai, M.Y.; Hung, Y.C.; Chen, Y.H.; Chen, Y.H.; Huang, Y.C.; Kao, C.W.; Su, Y.L.; Chiu, H.H.E.; Rau, K.M. A preliminary randomised controlled study of short-term *Antrodia cinnamomea* treatment combined with chemotherapy for patients with advanced cancer. *BMC Complement. Altern. Med.* **2016**, *16*, doi:10.1186/s12906-016-1312-9.
11. Chay, W.Y.; Tham, C.K.; Toh, H.C.; Lim, H.Y.; Tan, C.K.; Lim, C.; Wang, W.W.; Choo, S.P. *Coriolus versicolor* (Yunzhi) use as therapy in advanced hepatocellular carcinoma patients with poor liver function or who are unfit for standard therapy. *J. Altern. Complement. Med.* **2017**, *23*, 648–652, doi:10.1089/acm.2016.0136.
12. Torkelson, C.J.; Sweet, E.; Martzen, M.R.; Sasagawa, M.; Wenner, C.A.; Gay, J.; Putiri, A.; Standish, L.J. Phase 1 clinical trial of trametes versicolor in women with breast cancer . *ISRN Oncol.* **2012**, *2012*, 1–7, doi:10.5402/2012/251632.
13. Zhao, H.; Zhang, Q.; Zhao, L.; Huang, X.; Wang, J.; Kang, X. Spore powder of *Ganoderma lucidum* improves cancer-related fatigue in breast cancer patients undergoing endocrine therapy: A pilot clinical trial. *Evidence-based Complement. Altern. Med.* **2012**, *2012*, doi:10.1155/2012/809614.
14. Griessmayr, P.C.; Gauthier, M.; Barber, L.G.; Cotter, S.M. Mushroom-derived Maitake PETfraction as single agent for the treatment of lymphoma in dogs. *J. Vet. Intern. Med.* **2007**, *21*, 1409–1412, doi:10.1892/07-070.1.
15. Deng, G.; Lin, H.; Seidman, A.; Fornier, M.; D'Andrea, G.; Wesa, K.; Yeung, S.; Cunningham-

- Rundles, S.; Vickers, A.J.; Cassileth, B. A phase I/II trial of a polysaccharide extract from *Grifola frondosa* (Maitake mushroom) in breast cancer patients: Immunological effects. *J. Cancer Res. Clin. Oncol.* **2009**, *135*, 1215–1221, doi:10.1007/s00432-009-0562-z.
16. Wesa, K.M.; Cunningham-Rundles, S.; Klimek, V.M.; Vertosick, E.; Coletton, M.I.; Yeung, K.S.; Lin, H.; Nimer, S.; Cassileth, B.R. Maitake mushroom extract in myelodysplastic syndromes (MDS): a phase II study. *Cancer Immunol. Immunother.* **2014**, *64*, 237–247, doi:10.1007/s00262-014-1628-6.
17. Sumiyoshi, Y.; Hashine, K.; Takechi, Y.; Yoshimura, K.; Satou, T.; Kuruma, H.; Namiki, S.; Shinohara, N. Dietary administration of mushroom mycelium extracts in patients with early stage prostate cancers managed expectantly: A phase II study. *Jpn. J. Clin. Oncol.* **2010**, *40*, 967–972, doi:10.1093/jjco/hyq081.
18. Yamaguchi, Y.; Miyahara, E.; Hihara, J. Efficacy and safety of orally administered lentinula edodes mycelia extract for patients undergoing cancer chemotherapy: A pilot study. *Am. J. Chin. Med.* **2011**, *39*, 451–459, doi:10.1142/S0192415X11008956.
19. DeVere White, R.W.; Hackman, R.M.; Soares, S.E.; Beckett, L.A.; Sun, B. Effects of a mushroom mycelium extract on the treatment of prostate cancer. *Urology* **2002**, *60*, 640–644, doi:10.1016/S0090-4295(02)01856-3.
20. Ito, T.; Urushima, H.; Sakaue, M.; Yukawa, S.; Honda, H.; Hirai, K.; Igura, T.; Hayashi, N.; Maeda, K.; Kitagawa, T.; et al. Reduction of adverse effects by a mushroom product, active hexose correlated compound (AHCC) in patients with advanced cancer during chemotherapy—the significance of the levels of HHV-6 DNA in saliva as a surrogate biomarker during chemotherapy. *Nutr. Cancer* **2014**, *66*, 377–382, doi:10.1080/01635581.2014.884232.
21. Zhou, D.; Lin, L. Effect of Jinshuibao capsule on the immunological function of 36 patients with advanced cancer. *Zhongguo Zhong Xi Yi Jie He Za Zhi* . **1995**, *15*, 476–478.
22. Gao, Y.; Tang, W.; Dai, X.; Gao, H.; Chen, G.; Ye, J.; Chan, E.; Koh, H.L.; Li, X.; Zhou, S. Effects of water-soluble *Ganoderma lucidum* polysaccharides on the immune functions of patients with advanced lung cancer. *J. Med. Food* **2005**, *8*, 159–168, doi:10.1089/jmf.2005.8.159.
23. Gao, Y.; Zhou, S.; Jiang, W.; Huang, M.; Dai, X. Effects of Ganopoly® (a *Ganoderma lucidum* polysaccharide extract) on the immune functions in advanced-stage cancer patients. *Immunol. Invest.* **2003**, *32*, 201–215, doi:10.1081/IMM-120022979.
24. Gao, Y.; Dai, X.; Chen, G.; Ye, J.; Zhou, S. A Randomized, placebo-controlled, multicenter study of *Ganoderma lucidum* (W.Curt.:Fr.) Lloyd (Aphyllophoromycetidae) polysaccharides (Ganopoly) in patients with advanced lung cancer. *Int. J. Med. Mushrooms* **2003**, *5*, 14, doi:10.1615/intermedicmush.v5.i4.40.
25. Mo H; Hong M; Zhang J Effect of Wuse - Lingzhi - Jiaonang on reducing side-effects of radiotherapy and improving immune function in patients with nasopharyngeal cancer — MD Anderson Cancer Center. *Chinese J. Clin. Oncol.* **1999**, *26*, 216–218.
26. Oka S; Tanaka S; Yoshida S; Hiyama T; Ueno Y; Ito M; et al. A water-soluble extract from culture medium of *Ganoderma lucidum* mycelia suppresses the development of colorectal adenomas *Hiroshima J Med Sci* . **2010**, *59*, 1–6.
27. Nakano, H.; Namatame, K.; Nemoto, H.; Motohashi, H.; Nishiyama, K.; Kumada, K. A multi-institutional prospective study of lentinan in advanced gastric cancer patients with unresectable and recurrent diseases: Effect on prolongation of survival and improvement of quality of life. *Hepatogastroenterology*. **1999**, *46*, 2662–2668.
28. Hazama, S.; Watanabe, S.; Ohashi, M.; Yagi, M.; Suzuki, M.; Matsuda, K.; Yamamoto, T.; Suga, Y.; Suga, T.; Nakazawa, S.; Oka, M. Efficacy of Orally Administered Superfine Dispersed Lentinan ( $\beta$ -1,3-Glucan) for the Treatment of Advanced Colorectal Cancer. *Anticancer Res.* **2009**, *29*.
29. Yang, P.; Liang, M.; Zhang, Y.; Shen, B. Clinical application of a combination therapy of lentinan, multi-electrode RFA and TACE in HCC. *Adv. Ther.* **2008**, *25*, 787–794, doi:10.1007/s12325-008-0079-x.
30. Isoda, N.; Eguchi, Y.; Nukaya, H.; Hosho, K.; Suga, Y.; Sugae, T.; Nakazawa, S.; Sugano, K. Clinical efficacy of superfine dispersed lentinan ( $\beta$ -1,3-glucan) in patients with hepatocellular

carcinoma. *Hepatogastroenterology*. **2009**, 56, 437–441.

31. Okamura, K.; Suzuki, M.; Yajima, A.; Chihara, T.; Fujiwara, A.; Fukuda, T.; Goto, S.; Ichinohe, K.; Jimi, S.; Kasamatsu, T.; Kawai, N., Clinical evaluation of Schizophyllan combined with irradiation in patients with cervical cancer: A randomized controlled study. *Cancer* **1986**, 58, 865–872.
32. Zuo, Z.; Zuo, Z.; Liying, Z. Clinical observation on alleviating chemotherapy's side effect of psp in treating gastric careinoma. *LIAONING J. Tradit. Chinese Med.* **2001**, 28, 668–669.
33. Chen, S.; Oh, S.R.; Phung, S.; Hur, G.; Ye, J.J.; Kwok, S.L.; Shrode, G.E.; Belury, M.; Adams, L.S.; Williams, D. Anti-aromatase activity of phytochemicals in white button mushrooms (*Agaricus bisporus*). *Cancer Res.* **2006**, 66, 12026–12034, doi:10.1158/0008-5472.CAN-06-2206.
34. Yu L; Fernig DG; Smith JA; Milton JD; Rhodes JM Reversible inhibition of proliferation of epithelial cell lines by *Agaricus bisporus* (edible mushroom) lectin. *Cancer Res.* **1993**, 53, 4627–4632.
35. Rachmawati, H.; Sundari, S.; Nabila, N.; Tandrasasmita, O.M.; Amalia, R.; Siahaan, T.J.; Tjandrawinata, R.R.; Ismaya, W.T. Orf239342 from the mushroom *Agaricus bisporus* is a mannose binding protein. *Biochem. Biophys. Res. Commun.* **2019**, 515, 99–103, doi:10.1016/j.bbrc.2019.05.107.
36. Cheung, Y.H.; Sheridan, C.M.; Lo, A.C.Y.; Lai, W.W. Lectin from *Agaricus bisporus* inhibited S phase cell population and Akt phosphorylation in human RPE cells. *Investig. Ophthalmol. Vis. Sci.* **2012**, 53, 7469–7475, doi:10.1167/jovs.12-10589.
37. Sun, Y.; Cheng, M.; Dong, L.; Yang, K.; Ma, Z.; Yu, S.; Yan, P.; Bai, K.; Zhu, X.; Zhang, Q. *Agaricus blazei* extract (FA-2-b-β) induces apoptosis in chronic myeloid leukemia cells. *Oncol. Lett.* **2020**, 20, doi:10.3892/ol.2020.12133.
38. Shimizu, T.; Kawai, J.; Ouchi, K.; Kikuchi, H.; Osima, Y.; Hidemi, R. Agarol, an ergosterol derivative from *Agaricus blazei*, induces caspase-independent apoptosis in human cancer cells. *Int. J. Oncol.* **2016**, 48, 1670–1678, doi:10.3892/ijo.2016.3391.
39. Liu, Y.; Zhang, L.; Zhu, X.; Wang, Y.; Liu, W.; Gong, W. Polysaccharide *Agaricus blazei* Murill stimulates myeloid derived suppressor cell differentiation from M2 to M1 type, which mediates inhibition of tumour immune-evasion via the Toll-like receptor 2 pathway. *Immunology* **2015**, 146, 379–391, doi:10.1111/imm.12508.
40. Kobayashi, H.; Yoshida, R.; Kanada, Y.; Fukuda, Y.; Yagyu, T.; Inagaki, K.; Kondo, T.; Kurita, N.; Suzuki, M.; Kanayama, N.; et al. Suppressing effects of daily oral supplementation of beta-glucan extracted from *Agaricus blazei* Murill on spontaneous and peritoneal disseminated metastasis in mouse model. *J. Cancer Res. Clin. Oncol.* **2005**, 131, 527–538, doi:10.1007/s00432-005-0672-1.
41. Akiyama, H.; Endo, M.; Matsui, T.; Katsuda, I.; Emi, N.; Kawamoto, Y.; Koike, T.; Beppu, H. Agaritine from *Agaricus blazei* Murrill induces apoptosis in the leukemic cell line U937. *Biochim. Biophys. Acta - Gen. Subj.* **2011**, 1810, 519–525, doi:10.1016/j.bbagen.2011.02.010.
42. Cheng, F.; Yan, X.; Zhang, M.; Chang, M.; Yun, S.; Meng, J.; Liu, J.; Feng, C.P. Regulation of RAW 264.7 cell-mediated immunity by polysaccharides from: *Agaricus blazei* Murill via the MAPK signal transduction pathway. *Food Funct.* **2017**, 8, 1475–1480, doi:10.1039/c6fo01332e.
43. Ito H, S.K. Antitumor effects of a new polysaccharide-protein complex (ATOM) prepared from *Agaricus blazei* (Iwade strain 101) “Himematsutake” and its mechanisms in tumor-bearing mice - PubMed. *Anticancer Res.* **1997**, 17, 277–284.
44. Niu, Y.C.; Liu, J.C.; Zhao, X.M.; Cao, J. A low molecular weight polysaccharide isolated from *Agaricus blazei* Murill (LMPAB) exhibits its anti-metastatic effect by down-regulating metalloproteinase-9 and up-regulating Nm23-H1. *Am. J. Chin. Med.* **2009**, 37, 909–921, doi:10.1142/S0192415X09007351.
45. Gonzaga, M.L.C.; Bezerra, D.P.; Alves, A.P.N.N.; De Alencar, N.M.N.; De Oliveira Mesquita, R.; Lima, M.W.; De Aguiar Soares, S.; Pessoa, C.; De Moraes, M.O.; Costa-Lotufo, L.V. In vivo growth-inhibition of Sarcoma 180 by an α-(1 → 4)-glucan-β-(1 → 6)-glucan-protein complex polysaccharide obtained from *Agaricus blazei* Murill. *J. Nat. Med.* **2009**, 63, 32–40, doi:10.1007/s11418-008-0286-4.
46. Da Silva, A.F.; Sartori, D.; MacEdo, F.C.; Ribeiro, L.R.; Fungaro, M.H.P.; Mantovani, M.S. Effects



- of  $\beta$ -glucan extracted from *Agaricus blazei* on the expression of ERCC5, CASP9, and CYP1A1 genes and metabolic profile in HepG2 cells. *Hum. Exp. Toxicol.* **2013**, *32*, 647–654, doi:10.1177/0960327112468173.
47. Murakawa, K.; Fukunaga, K.; Tanouchi, M.; Hosokawa, M.; Hossain, Z.; Takahashi, K. Therapy of myeloma in vivo using marine phospholipid in combination with *Agaricus blazei* Murill as an immune respond activator. *J. Oleo Sci.* **2007**, *56*, 179–188, doi:10.5650/jos.56.179.
  48. Kimura, Y.; Kido, T.; Takaku, T.; Sumiyoshi, M.; Baba, K. Isolation of an anti-angiogenic substance from *Agaricus blazei* Murill: Its antitumor and antimetastatic actions. *Cancer Sci.* **2004**, *95*, 758–764, doi:10.1111/j.1349-7006.2004.tb03258.x.
  49. Taveira, V.C.; Novaes, M.R.C.G.; Reis, M.D.A.; Da Silva, M.F. Hematologic and metabolic effects of dietary supplementation with *Agaricus sylvaticus* fungi on rats bearing solid walker 256 tumor. *Exp. Biol. Med.* **2008**, *233*, 1341–1347, doi:10.3181/0803-RM-107.
  50. Jiao, C.; Xie, Y.Z.; Yang, X.; Li, H.; Li, X.M.; Pan, H.H.; Cai, M.H.; Zhong, H.M.; Yang, B.B. Anticancer activity of *Amauroderma rude*. *PLoS One* **2013**, *8*, doi:10.1371/journal.pone.0066504.
  51. Yang, H.L.; Kuo, Y.H.; Tsai, C.T.; Huang, Y.T.; Chen, S.C.; Chang, H.W.; Lin, E.; Lin, W.H.; Hseu, Y.C. Anti-metastatic activities of *Antrodia camphorata* against human breast cancer cells mediated through suppression of the MAPK signaling pathway. *Food Chem. Toxicol.* **2011**, *49*, 290–298, doi:10.1016/j.fct.2010.10.031.
  52. Lee, C.C.; Yang, H.L.; Way, T. Der; Kumar, K.J.S.; Juan, Y.C.; Cho, H.J.; Lin, K.Y.; Hsu, L.S.; Chen, S.C.; Hseu, Y.C. Inhibition of cell growth and induction of apoptosis by *Antrodia camphorata* in HER-2/neu-overexpressing breast cancer cells through the induction of ROS, depletion of HER-2/neu, and disruption of the PI3K/Akt signaling pathway. *Evidence-based Complement. Altern. Med.* **2012**, *2012*, doi:10.1155/2012/702857.
  53. Chen, Y.Y.; Chou, P.Y.; Chien, Y.C.; Wu, C.H.; Wu, T.S.; Sheu, M.J. Ethanol extracts of fruiting bodies of *Antrodia cinnamomea* exhibit anti-migration action in human adenocarcinoma CL1-0 cells through the MAPK and PI3K/AKT signaling pathways. *Phytomedicine* **2012**, *19*, 768–778, doi:10.1016/j.phymed.2012.02.016.
  54. Chen, M.C.; Hsu, W.L.; Chou, T.C. Anti-cachectic effect of *Antrodia cinnamomea* extract in lung tumor-bearing mice under chemotherapy. *Oncotarget* **2018**, *9*, 19584–19596, doi:10.18632/oncotarget.24680.
  55. Lin, Y.S.; Lin, Y.Y.; Yang, Y.H.; Lin, C.L.; Kuan, F.C.; Lu, C.N.; Chang, G.H.; Tsai, M.S.; Hsu, C.M.; Yeh, R.A.; et al. *Antrodia cinnamomea* extract inhibits the proliferation of tamoxifen-resistant breast cancer cells through apoptosis and skp2/microRNAs pathway. *BMC Complement. Altern. Med.* **2018**, *18*, doi:10.1186/s12906-018-2204-y.
  56. Du, Y.C.; Chang, F.R.; Wu, T.Y.; Hsu, Y.M.; El-Shazly, M.; Chen, C.F.; Sung, P.J.; Lin, Y.Y.; Lin, Y.H.; Wu, Y.C.; et al. Antileukemia component, dehydroeburicoic acid from *Antrodia camphorata* induces DNA damage and apoptosis in vitro and in vivo models. *Phytomedicine* **2012**, *19*, 788–796, doi:10.1016/j.phymed.2012.03.014.
  57. Chang, C.T.; Korivi, M.; Huang, H.C.; Thiyagarajan, V.; Lin, K.Y.; Huang, P.J.; Liu, J.Y.; Hseu, Y.C.; Yang, H.L. Inhibition of ROS production, autophagy or apoptosis signaling reversed the anticancer properties of *Antrodia salmonea* in triple-negative breast cancer (MDA-MB-231) cells. *Food Chem. Toxicol.* **2017**, *103*, 1–17, doi:10.1016/j.fct.2017.02.019.
  58. Chang, C.T.; Hseu, Y.C.; Thiyagarajan, V.; Huang, H.C.; Hsu, L.S.; Huang, P.J.; Liu, J.Y.; Liao, J.W.; Yang, H.L. *Antrodia salmonea* induces G2 cell-cycle arrest in human triple-negative breast cancer (MDA-MB-231) cells and suppresses tumor growth in athymic nude mice. *J. Ethnopharmacol.* **2017**, *196*, 9–19, doi:10.1016/j.jep.2016.12.018.
  59. Hseu, Y.C.; Lin, Y.C.; Rajendran, P.; Thigarajan, V.; Mathew, D.C.; Lin, K.Y.; Way, T. Der; Liao, J.W.; Yang, H.L. *Antrodia salmonea* suppresses invasion and metastasis in triple-negative breast cancer cells by reversing EMT through the NF- $\kappa$ B and Wnt/ $\beta$ -catenin signaling pathway. *Food Chem. Toxicol.* **2019**, *124*, 219–230, doi:10.1016/j.fct.2018.12.009.
  60. Yang, H.L.; Lin, R.W.; Rajendran, P.; Mathew, D.C.; Thigarajan, V.; Lee, C.C.; Hsu, C.J.; Hseu, Y.C. *Antrodia salmonea*-induced oxidative stress abrogates HER-2 signaling cascade and enhanced apoptosis in ovarian carcinoma cells. *J. Cell. Physiol.* **2019**, *234*, 3029–3042,

doi:10.1002/jcp.27123.

61. Yang, H.-L.; Liu, H.-W.; Shrestha, S.; Thiagarajan, V.; Huang, H.-C.; Hseu, Y.-C. *Antrodia salmonea* induces apoptosis and enhances cytoprotective autophagy in colon cancer cells. *Aging (Albany, NY)*. **2021**, *13*, doi:10.18632/aging.203019.
62. Pan, H.; Han, Y.; Huang, J.; Yu, X.; Jiao, C.; Yang, X.; Dhaliwal, P.; Xie, Y.; Yang, B.B. Purification and identification of a polysaccharide from medicinal mushroom *Amauroderma rude* with immunomodulatory activity and inhibitory effect on tumor growth. *Oncotarget* **2015**, *6*, 17777–17791, doi:10.18632/oncotarget.4397.
63. Li, X.; Wu, Q.; Xie, Y.; Ding, Y.; Du, W.W.; Sdiri, M.; Yang, B.B. Ergosterol purified from medicinal mushroom *Amauroderma rude* inhibits cancer growth in vitro and in vivo by up-regulating multiple tumor suppressors. *Oncotarget* **2015**, *6*, 17832–17846, doi:10.18632/oncotarget.4026.
64. Ping, Z.; Xu, H.; Liu, T.; Huang, J.; Meng, Y.; Xu, X.; Li, W.; Zhang, L. Anti-hepatoma activity of the stiff branched  $\beta$ -d-glucan and effects of molecular weight. *J. Mater. Chem. B* **2016**, *4*, 4565–4573, doi:10.1039/c6tb01299j.
65. Matuszewska, A.; Stefaniuk, D.; Jaszek, M.; Pięć, M.; Zająć, A.; Matuszewski, Ł.; Cios, I.; Graż, M.; Paduch, R.; Bancerz, R. Antitumor potential of new low molecular weight antioxidative preparations from the white rot fungus *Cerrena unicolor* against human colon cancer cells. *Sci. Rep.* **2019**, *9*, doi:10.1038/s41598-018-37947-z.
66. Wu, J.Y.; Zhang, Q.X.; Leung, P.H. Inhibitory effects of ethyl acetate extract of *Cordyceps sinensis* mycelium on various cancer cells in culture and B16 melanoma in C57BL/6 mice. *Phytomedicine* **2007**, *14*, 43–49, doi:10.1016/j.phymed.2005.11.005.
67. Ho, C.Y.; Kim, C.F.; Leung, K.N.; Fung, K.P.; Tse, T.F.; Chan, H.; Lau, C.B.S. Differential anti-tumor activity of *Coriolus versicolor* (Yunzhi) extract through p53- and/or Bcl-2-dependent apoptotic pathway in human breast cancer cells. *Cancer Biol. Ther.* **2005**, *4*, 638–644, doi:10.4161/cbt.4.6.1721.
68. Luo, K.W.; Yue, G.G.L.; Ko, C.H.; Lee, J.K.M.; Gao, S.; Li, L.F.; Li, G.; Fung, K.P.; Leung, P.C.; Lau, C.B.S. In vivo and in vitro anti-tumor and anti-metastasis effects of *Coriolus versicolor* aqueous extract on mouse mammary 4T1 carcinoma. *Phytomedicine* **2014**, *21*, 1078–1087, doi:10.1016/j.phymed.2014.04.020.
69. Torres, S.; Cajas, D.; Palfner, G.; Astuya, A.; Aballay, A.; Pérez, C.; Hernández, V.; Becerra, J. Steroidal composition and cytotoxic activity from fruiting body of *Cortinarius xiphidipus*. *Nat. Prod. Res.* **2017**, *31*, 473–476, doi:10.1080/14786419.2016.1185717.
70. Maruyama, H.; Ikekawa, T. Immunomodulation and antitumor activity of a mushroom product, proflamin, isolated from *Flammulina velutipes* (W. Curt.: Fr.) singer (agaricomycetidae). *Int. J. Med. Mushrooms* **2007**, *9*, 109–122, doi:10.1615/IntJMedMushr.v9.i2.20.
71. YC, C.; YM, H.; MF, W.; CC, O.; YW, L.; KH, L.; JL, K. Interruption of lung cancer cell migration and proliferation by fungal immunomodulatory protein FIP-fve from *Flammulina velutipes*. *J. Agric. Food Chem.* **2013**, *61*, 12044–12052, doi:10.1021/JF4030272.
72. Deveci, E.; Tel-Çayan, G.; Duru, M.E.; Öztürk, M. Isolation, characterization, and bioactivities of compounds from *Fuscoporia torulosa* mushroom. *J. Food Biochem.* **2019**, *43*, doi:10.1111/jfbc.13074.
73. Wang, C.; Shi, S.; Chen, Q.; Lin, S.; Wang, R.; Wang, S.; Chen, C. Antitumor and Immunomodulatory Activities of *Ganoderma lucidum* polysaccharides in Glioma-Bearing Rats. *Integr. Cancer Ther.* **2018**, *17*, 674–683, doi:10.1177/1534735418762537.
74. Qu, L.; Li, S.; Zhuo, Y.; Chen, J.; Qin, X.; Guo, G. Anticancer effect of triterpenes from *Ganoderma lucidum* in human prostate cancer cells. *Oncol. Lett.* **2017**, *14*, 7467–7472, doi:10.3892/ol.2017.7153.
75. Zhao, R. lin; He, Y. min Network pharmacology analysis of the anti-cancer pharmacological mechanisms of *Ganoderma lucidum* extract with experimental support using Hepa1-6-bearing C57 BL/6 mice. *J. Ethnopharmacol.* **2018**, *210*, 287–295, doi:10.1016/j.jep.2017.08.041.
76. Soares, R.; Meireles, M.; Rocha, A.; Pirraco, A.; Obiol, D.; Alonso, E.; Joos, G.; Balogh, G. Maitake (D fraction) mushroom extract induces apoptosis in breast cancer cells by BAK-1 gene activation. *J. Med. Food* **2011**, *14*, 563–572, doi:10.1089/JMF.2010.0095.

77. Baek, J.; Roh, H.S.; Baek, K.H.; Lee, S.; Lee, S.; Song, S.S.; Kim, K.H. Bioactivity-based analysis and chemical characterization of cytotoxic constituents from Chaga mushroom (*Inonotus obliquus*) that induce apoptosis in human lung adenocarcinoma cells. *J. Ethnopharmacol.* **2018**, *224*, 63–75, doi:10.1016/j.jep.2018.05.025.
78. Ma, L.; Chen, H.; Dong, P.; Lu, X. Anti-inflammatory and anticancer activities of extracts and compounds from the mushroom *Inonotus obliquus*. *Food Chem.* **2013**, *139*, 503–508, doi:10.1016/j.foodchem.2013.01.030.
79. Liu, B.; Zhong, M.; Lun, Y.; Wang, X.; Sun, W.; Li, X.; Ning, A.; Cao, J.; Zhang, W.; Liu, L.; Huang, M. A novel apoptosis correlated molecule: expression and characterization of protein Latcripin-1 from *Lentinula edodes* C(91-3). *Int. J. Mol. Sci.* **2012**, *13*, 6246–6265, doi:10.3390/IJMS13056246.
80. Wang, J.; Zhong, M.; Liu, B.; Sha, L.; Lun, Y.; Zhang, W.; Li, X.; Wang, X.; Cao, J.; Ning, A.; Huang, M.J. Expression and functional analysis of novel molecule - Latcripin-13 domain from *Lentinula edodes* C91-3 produced in prokaryotic expression system. *Gene* **2015**, *555*, 469–475, doi:10.1016/J.GENE.2014.11.014.
81. Prateep, A.; Sumkhemthong, S.; Suksomtip, M.; Chanvorachote, P.; Chaotham, C. Peptides extracted from edible mushroom: *Lentinus squarrosulus* induces apoptosis in human lung cancer cells. *Pharm. Biol.* **2017**, *55*, 1792–1799, doi:10.1080/13880209.2017.1325913.
82. Khine, H.E.E.; Ecoy, G.A.U.; Roytrakul, S.; Phaonakrop, N.; Pornputtapong, N.; Prompetchara, E.; Chanvorachote, P.; Chaotham, C. Chemosensitizing activity of peptide from *Lentinus squarrosulus* (Mont.) on cisplatin-induced apoptosis in human lung cancer cells. *Sci. Rep.* **2021**, *11*, doi:10.1038/s41598-021-83606-1.
83. Fortin, H.; Tomasi, S.; Delcros, J.G.; Bansard, J.Y.; Boustie, J. In vivo antitumor activity of clitocine, an exocyclic amino nucleoside isolated from *Lepista inversa*. *ChemMedChem* **2006**, *1*, 189–196, doi:10.1002/CMDC.200500029.
84. Yap, H.Y.Y.; Fung, S.Y.; Ng, S.T.; Tan, C.S.; Tan, N.H. Shotgun proteomic analysis of tiger milk mushroom (*Lignosus rhinocerotis*) and the isolation of a cytotoxic fungal serine protease from its sclerotium. *J. Ethnopharmacol.* **2015**, *174*, 437–451, doi:10.1016/j.jep.2015.08.042.
85. Yap, H.Y.Y.; Tan, N.H.; Ng, S.T.; Tan, C.S.; Fung, S.Y. Molecular attributes and apoptosis-inducing activities of a putative serine protease isolated from Tiger Milk mushroom (*Lignosus rhinocerus*) sclerotium against breast cancer cells in vitro. *PeerJ* **2018**, *2018*, doi:10.7717/peerj.4940.
86. Kong, B.H.; Teoh, K.H.; Tan, N.H.; Tan, C.S.; Ng, S.T.; Fung, S.Y. Proteins from *Lignosus tigris* with selective apoptotic cytotoxicity towards MCF7 cell line and suppresses MCF7- xenograft tumor growth. *PeerJ* **2020**, *8*, doi:10.7717/peerj.9650.
87. Shomali, N.; Onar, O.; Karaca, B.; Demirtas, N.; Cihan, A.C.; Akata, I.; Yildirim, O. Antioxidant, anticancer, antimicrobial, and antibiofilm properties of the culinary-medicinal fairy ring mushroom, *Marasmius oreades* (Agaricomycetes). *Int. J. Med. Mushrooms* **2019**, *21*, 571–582, doi:10.1615/INTJMEDMUSHROOMS.2019030874.
88. Petrova, R.D.; Mahajna, J.; Wasser, S.P.; Ruimi, N.; Denchev, C.M.; Sussan, S.; Nevo, E.; Reznick, A.Z. *Marasmius oreades* substances block NF-kappaB activity through interference with IKK activation pathway. *Mol. Biol. Rep.* **2009**, *36*, 737–744, doi:10.1007/S11033-008-9237-0.
89. Sliva, D.; Jedinak, A.; Kawasaki, J.; Harvey, K.; Slivova, V. *Phellinus linteus* suppresses growth, angiogenesis and invasive behaviour of breast cancer cells through the inhibition of AKT signalling. *Br. J. Cancer* **2008**, *98*, 1348–1356, doi:10.1038/SJ.BJC.6604319.
90. Guo, J.; Zhu, T.; Collins, L.; Xiao, Z.X.; Kim, S.H.; Chen, C.Y. Modulation of lung cancer growth arrest and apoptosis by *Phellinus linteus*. *Mol. Carcinog.* **2007**, *46*, 144–154, doi:10.1002/MC.20275.
91. Tsuji, T.; Du, W.; Nishioka, T.; Chen, L.; Yamamoto, D.; Chen, C.Y. *Phellinus linteus* extract sensitizes advanced prostate cancer cells to apoptosis in athymic nude mice. *PLoS One* **2010**, *5*, doi:10.1371/JOURNAL.PONE.0009885.
92. Huang, H.Y.; Chieh, S.Y.; Tso, T.K.; Chien, T.Y.; Lin, H.T.; Tsai, Y.C. Orally administered mycelial culture of *Phellinus linteus* exhibits antitumor effects in hepatoma cell-bearing mice. *J. Ethnopharmacol.* **2011**, *133*, 460–466, doi:10.1016/J.JEP.2010.10.015.
93. Zhang, Y.; Zhang, Y.; Gao, W.; Zhou, R.; Liu, F.; Ng, T.B. A novel antitumor protein from the

mushroom *Pholiota nameko* induces apoptosis of human breast adenocarcinoma MCF-7 cells in vivo and modulates cytokine secretion in mice bearing MCF-7 xenografts. *Int. J. Biol. Macromol.* **2020**, *164*, 3171–3178, doi:10.1016/J.IJBIOMAC.2020.08.187.

94. Qian, L.; Zhang, Y.; Liu, F. Purification and characterization of a ~43 kDa antioxidant protein with antitumor activity from *Pholiota nameko*. *J. Sci. Food Agric.* **2016**, *96*, 1044–1052, doi:10.1002/JFSA.7194.
95. Shi, X.; Zhao, Y.; Jiao, Y.; Shi, T.; Yang, X. ROS-dependent mitochondria molecular mechanisms underlying antitumor activity of *Pleurotus abalonus* acidic polysaccharides in human breast cancer MCF-7 cells. *PLoS One* **2013**, *8*, doi:10.1371/JOURNAL.PONE.0064266.
96. Haque, M.A.; Reza, A.S.M.A.; Nasrin, M.S.; Rahman, M.A. *Pleurotus highking* mushrooms potentiate antiproliferative and antimigratory activity against triple-negative breast cancer cells by suppressing Akt signaling. *Integr. Cancer Ther.* **2020**, *19*, doi:10.1177/1534735420969809.
97. Ma, H.; Mau, I. *Pleurotus highking* mushroom induces apoptosis by altering the balance of proapoptotic and antiapoptotic genes in breast cancer cells and inhibits tumor sphere formation. *Medicina (Kaunas)*. **2019**, *55*, doi:10.3390/MEDICINA55110716.
98. Cha, Y.J.; Alam, N.; Lee, J.S.; Lee, K.R.; Shim, M.J.; Lee, M.W.; Kim, H.Y.; Shin, P.G.; Cheong, J.C.; Yoo, Y.B.; Lee, T.S. Anticancer and immunopotentiating activities of crude polysaccharides from *Pleurotus nebrodensis* on mouse sarcoma 180. *Mycobiology* **2012**, *40*, 236–243, doi:10.5941/MYCO.2012.40.4.236.
99. Cui, H.; Wang, C.; Wang, Y.; Li, Z.; Zhang, Y.; Chen, M.; Li, F. *Pleurotus nebrodensis* polysaccharide induces apoptosis in human non-small cell lung cancer A549 cells. *Carbohydr. Polym.* **2014**, *104*, 246–252, doi:10.1016/J.CARBPOL.2014.01.001.
100. Andrej, J.; Silva, D. *Pleurotus ostreatus* inhibits proliferation of human breast and colon cancer cells through p53-dependent as well as p53-independent pathway. *Int J Oncol.* **2008**, *33*, 1307–1313.
101. Ebrahimi, A.; Atashi, A.; Soleimani, M.; Mashhadikhan, M.; Barahimi, A.; Kaviani, S. Comparison of anticancer effect of *Pleurotus ostreatus* extract with doxorubicin hydrochloride alone and plus thermotherapy on erythroleukemia cell line. *J. Complement. Integr. Med.* **2017**, *15*, doi:10.1515/JCIM-2016-0136.
102. Zhang, M.; Chiu, L.; Cheung, P.; Ooi, V. Growth-inhibitory effects of a beta-glucan from the mycelium of *Poria cocos* on human breast carcinoma MCF-7 cells: cell-cycle arrest and apoptosis induction - PubMed. *Oncol Rep.* **2006**, *15*, 637–643.
103. Pięt, M.; Zając, A.; Paduch, R.; Jaszek, M.; Frant, M.; Stefaniuk, D.; Matuszewska, A.; Grzywnowicz, K. Chemopreventive activity of bioactive fungal fractions isolated from milk-supplemented cultures of *Cerrena unicolor* and *Pycnoporus sanguineus* on colon cancer cells. *3 Biotech* **2021**, *11*, doi:10.1007/s13205-020-02591-w.
104. Liu, K.; Wang, J.; Zhao, L.; Wang, Q. Anticancer, antioxidant and antibiotic activities of mushroom *Ramaria flava*. *Food Chem. Toxicol.* **2013**, *58*, 375–380, doi:10.1016/j.fct.2013.05.001.
105. Khatua, S.; Chandra, S.; Acharya, K. Expanding knowledge on *Russula alatoretica*, a novel mushroom from tribal cuisine, with chemical and pharmaceutical relevance. *Cytotechnology* **2019**, *71*, 245–259, doi:10.1007/s10616-018-0280-y.
106. Mansour, A.; Daba, A.; Baddour, N.; El-Saadani, M.; Aleem, E. Schizophyllan inhibits the development of mammary and hepatic carcinomas induced by 7,12 dimethylbenz(α)anthracene and decreases cell proliferation: comparison with tamoxifen. *J. Cancer Res. Clin. Oncol.* **2012**, *138*, 1579–1596, doi:10.1007/S00432-012-1224-0.
107. Norikura, T.; Fujiwara, K.; Narita, T.; Yamaguchi, S.; Morinaga, Y.; Iwai, K.; Matsue, H. Anticancer activities of thelephantin O and vialinin A isolated from *Thelephora aurantiotincta*. *J. Agric. Food Chem.* **2011**, *59*, 6974–6979, doi:10.1021/jf200461j.
108. Chien, R.C.; Lin, Y.C.; Mau, J.L. Apoptotic effect of Taiwanofungus salmoneus (Agaricomycetes) mycelia and solid-state fermented products on cancer cells. *Int. J. Med. Mushrooms* **2017**, *19*, 777–795, doi:10.1615/IntJMedMushrooms.2017024264.
109. Li, M.; Zhang, G.; Wang, H.; Ng, T. Purification and characterization of a laccase from the edible wild mushroom *Tricholoma mongolicum*. *J. Microbiol. Biotechnol.* **2010**, *20*, 1069–1076,

doi:10.4014/JMB.0912.12033.

110. Quang, D.N.; Lam, D.M.; Hanh, N.T.H.; Queb, D.D. Cytotoxic constituents from the fungus *Daldinia concentrica* (Xylariaceae). *Nat. Prod. Res.* **2013**, *27*, 486–490.
111. Jiang, J.; Sliva, D. Novel medicinal mushroom blend suppresses growth and invasiveness of human breast cancer cells. *Int. J. Oncol.* **2010**, *37*, doi:10.3892/ijo\_00000806.
112. Takaku, T.; Kimura, Y.; Okuda, H. Isolation of an antitumor compound from *Agaricus blazei* Murill and its mechanism of action. *J. Nutr.* **2001**, *131*, 1409–1413, doi:10.1093/jn/131.5.1409.
113. Fujimiya, Y.; Suzuki, Y.; Oshiman, K.I.; Kobori, H.; Moriguchi, K.; Nakashima, H.; Matumoto, Y.; Takahara, S.; Ebina, T.; Katakura, R. Selective tumoricidal effect of soluble proteoglycan extracted from the basidiomycete, *Agaricus blazei* Murill, mediated via natural killer cell activation and apoptosis. *Cancer Immunol. Immunother.* **1998**, *46*, 147–159, doi:10.1007/s002620050473.
114. Y Fujimiya; Y Suzuki; R Katakura; T Ebina Tumor-specific cytotoxic and immunopotentiating effects of relatively low molecular weight products derived from the basidiomycete, *Agaricus blazei* Murill.. *Anticancer Res.* **1999**, *19*, 113–118.
115. Oshiman, K.I.; Fujimiya, Y.; Ebina, T.; Suzuki, I.; Noji, M. Orally administered  $\beta$ -1,6-D-polyglucose extracted from *Agaricus blazei* results in tumor regression in tumor-bearing mice. *Planta Med.* **2002**, *68*, 610–614, doi:10.1055/s-2002-32904.
116. Rao, Y.K.; Wu, A.T.H.; Geethangili, M.; Huang, M. Te; Chao, W.J.; Wu, C.H.; Deng, W.P.; Yeh, C.T.; Tzeng, Y.M. Identification of antrocin from *Antrodia camphorata* as a selective and novel class of small molecule inhibitor of Akt/mTOR signaling in metastatic breast cancer MDA-MB-231 cells. *Chem. Res. Toxicol.* **2011**, *24*, 238–245, doi:10.1021/tx100318m.
117. Kumar, K.J.S.; Vani, M.G.; Hsieh, H.W.; Lin, C.C.; Wang, S.Y. Antcin-A modulates epithelial-to-mesenchymal transition and inhibits migratory and invasive potentials of human breast cancer cells via p53-mediated mir-200c activation. *Planta Med.* **2019**, *85*, 755–765, doi:10.1055/a-0942-2087.
118. Kowalczywska, M.; Piotrowski, J.; Jedrzejewski, T.; Kozak, W. Polysaccharide peptides from *Coriolus versicolor* exert differential immunomodulatory effects on blood lymphocytes and breast cancer cell line MCF-7 in vitro. *Immunol. Lett.* **2016**, *174*, 37–44, doi:10.1016/j.imlet.2016.04.010.
119. Yoshikawa N; Kunitomo M; Kagota S; Shinozuka K; Nakamura K. Inhibitory effect of cordycepin on hematogenic metastasis of B16-F1 mouse melanoma cells accelerated by adenosine-5'-diphosphate. *Anticancer Res.* **2009**, *29*, 3857–3860.
120. Wang, Z.; Wu, X.; Liang, Y.N.; Wang, L.; Song, Z.X.; Liu, J.L.; Tang, Z.S. Cordycepin induces apoptosis and inhibits proliferation of human lung cancer cell line H1975 via inhibiting the phosphorylation of EGFR. *Molecules* **2016**, *21*, doi:10.3390/molecules21101267.
121. Wei, C.; Yao, X.; Jiang, Z.; Wang, Y.; Zhang, D.; Chen, X.; Fan, X.; Xie, C.; Cheng, J.; Fu, J.; et al. Cordycepin Inhibits drug-resistance non-small cell lung cancer progression by activating AMPK signaling pathway. *Pharmacol. Res.* **2019**, *144*, 79–89, doi:10.1016/j.phrs.2019.03.011.
122. Chang, M.M.; Hong, S.Y.; Yang, S.H.; Wu, C.C.; Wang, C.Y.; Huang, B.M. Anti-cancer effect of cordycepin on FGF9-induced testicular tumorigenesis. *Int. J. Mol. Sci.* **2020**, *21*, 1–21, doi:10.3390/ijms21218336.
123. Martínez-Montemayor, M.M.; Ling, T.; Suárez-Arroyo, I.J.; Ortiz-Soto, G.; Santiago-Negrón, C.L.; Lacourt-Ventura, M.Y.; Valentín-Acevedo, A.; Lang, W.H.; Rivas, F. Identification of biologically active ganoderma lucidum compounds and synthesis of improved derivatives that confer anti-cancer activities in vitro. *Front. Pharmacol.* **2019**, *10*, doi:10.3389/fphar.2019.00115.
124. Wu, G.S.; Lu, J.J.; Guo, J.J.; Li, Y.B.; Tan, W.; Dang, Y.Y.; Zhong, Z.F.; Xu, Z.T.; Chen, X.P.; Wang, Y.T. Ganoderic acid DM, a natural triterpenoid, induces DNA damage, G1 cell cycle arrest and apoptosis in human breast cancer cells. *Fitoterapia* **2012**, *83*, 408–414, doi:10.1016/j.fitote.2011.12.004.
125. Li, F.; Wang, Y.; Wang, X.; Li, J.; Cui, H.; Niu, M. Ganoderic acids suppress growth and angiogenesis by modulating the NF- $\kappa$ B signaling pathway in breast cancer cells. *Int. J. Clin. Pharmacol. Ther.* **2012**, *50*, 712–721, doi:10.5414/CP201663.

126. Yang, Y.; Zhou, H.; Liu, W.; Wu, J.; Yue, X.; Wang, J.; Quan, L.; Liu, H.; Guo, L.; Wang, Z.; et al. Ganoderic acid a exerts antitumor activity against MDA-MB-231 human breast cancer cells by inhibiting the Janus kinase 2/signal transducer and activator of transcription 3 signaling pathway. *Oncol. Lett.* **2018**, *16*, 6515–6521, doi:10.3892/ol.2018.9475.
127. Kodama, N.; Komuta, K.; Nanba, H. Effect of maitake (*Grifola frondosa*) D-Fraction on the activation of NK Cells in cancer patients. *J. Med. Food* **2003**, *6*, 371–377, doi:10.1089/109662003772519949.
128. Masuda, Y.; Nawa, D.; Nakayama, Y.; Konishi, M.; Nanba, H. Soluble  $\beta$ -glucan from *Grifola frondosa* induces tumor regression in synergy with TLR9 agonist via dendritic cell-mediated immunity. *J. Leukoc. Biol.* **2015**, *98*, 1015–1025, doi:10.1189/jlb.1a0814-415rr.
129. Kodama N; Asakawa A; Inui A; Masuda Y; Nanba H. Enhancement of cytotoxicity of NK cells by D-Fraction, a polysaccharide from *Grifola frondosa*. *Oncol Rep.* **2005**, *13*, 497–502.
130. Masuda, Y.; Nakayama, Y.; Mukae, T.; Tanaka, A.; Naito, K.; Konishi, M. Maturation of dendritic cells by maitake  $\alpha$ -glucan enhances anti-cancer effect of dendritic cell vaccination. *Int. Immunopharmacol.* **2019**, *67*, 408–416, doi:10.1016/j.intimp.2018.12.039.
131. Masuda, Y.; Nakayama, Y.; Tanaka, A.; Naito, K.; Konishi, M. Antitumor activity of orally administered maitake  $\alpha$ -glucan by stimulating antitumor immune response in murine tumor. *PLoS One* **2017**, *12*, doi:10.1371/journal.pone.0173621.
132. Masuda, Y.; Inoue, H.; Ohta, H.; Miyake, A.; Konishi, M.; Nanba, H. Oral administration of soluble  $\beta$ -glucans extracted from *Grifola frondosa* induces systemic antitumor immune response and decreases immunosuppression in tumor-bearing mice. *Int. J. Cancer* **2013**, *133*, 108–119, doi:10.1002/ijc.27999.
133. Masuda, Y.; Togo, T.; Mizuno, S.; Konishi, M.; Nanba, H. Soluble  $\beta$ -glucan from *Grifola frondosa* induces proliferation and Dectin-1/Syk signaling in resident macrophages via the GM-CSF autocrine pathway. *J. Leukoc. Biol.* **2012**, *91*, 547–556, doi:10.1189/jlb.0711386.
134. Masuda, Y.; Ito, K.; Konishi, M.; Nanba, H. A polysaccharide extracted from *Grifola frondosa* enhances the anti-tumor activity of bone marrow-derived dendritic cell-based immunotherapy against murine colon cancer. *Cancer Immunol. Immunother.* **2010**, *59*, 1531–1541, doi:10.1007/s00262-010-0880-7.
135. Kodama, N.; Komuta, K.; Sakai, N.; Nanba, H. Effects of D-Fraction, a polysaccharide from *Grifola frondosa* on tumor growth involve activation of NK cells. *Biol. Pharm. Bull.* **2002**, *25*, 1647–1650, doi:10.1248/bpb.25.1647.
136. Kang, J.H.; Jang, J.E.; Mishra, S.K.; Lee, H.J.; Nho, C.W.; Shin, D.; Jin, M.; Kim, M.K.; Choi, C.; Oh, S.H. Ergosterol peroxide from Chaga mushroom (*Inonotus obliquus*) exhibits anti-cancer activity by down-regulation of the  $\beta$ -catenin pathway in colorectal cancer. *J. Ethnopharmacol.* **2015**, *173*, 303–312, doi:10.1016/j.jep.2015.07.030.
137. He, J.B.; Tao, J.; Miao, X.S.; Bu, W.; Zhang, S.; Dong, Z.J.; Li, Z.H.; Feng, T.; Liu, J.K. Seven new drimane-type sesquiterpenoids from cultures of fungus *Laetiporus sulphureus*. *Fitoterapia* **2015**, *102*, 1–6, doi:10.1016/j.fitote.2015.01.022.
138. Jeff, I.B.; Fan, E.; Tian, M.; Song, C.; Yan, J.; Zhou, Y. In vivo anticancer and immunomodulating activities of mannogalactoglucan-type polysaccharides from *Lentinus edodes* (Berkeley) singer. *Cent. Eur. J. Immunol.* **2016**, *41*, 47–53, doi:10.5114/ceji.2015.56962.
139. Jeff, I.B.; Li, S.; Peng, X.; Kassim, R.M.R.; Liu, B.; Zhou, Y. Purification, structural elucidation and antitumor activity of a novel mannogalactoglucan from the fruiting bodies of *Lentinus edodes*. *Fitoterapia* **2013**, *84*, 338–346, doi:10.1016/j.fitote.2012.12.008.
140. Erkel, G.; Anke, T.; Sterner, O. Inhibition of NF- $\kappa$ B activation by panepoxydone. *Biochem. Biophys. Res. Commun.* **1996**, *226*, 214–221, doi:10.1006/bbrc.1996.1335.
141. Arora, R.; Yates, C.; Gary, B.D.; McClellan, S.; Tan, M.; Xi, Y.; Reed, E.; Piazza, G.A.; Owen, L.B.; Dean-Colomb, W. Panepoxydone targets NF- $\kappa$ B and FOXM1 to inhibit proliferation, induce apoptosis and reverse epithelial to mesenchymal transition in breast cancer. *PLoS One* **2014**, *9*, doi:10.1371/journal.pone.0098370.
142. Fangkrathok, N.; Sripanidkulchai, B.; Umehara, K.; Noguchi H. Bioactive ergostanoids and a new polyhydroxyoctane from *Lentinus polychrous* mycelia and their inhibitory effects on E2-

- enhanced cell proliferation of T47D cells. *Nat. Prod. Res.* **2013**, *27*, 1611–1619, doi:10.1080/14786419.2012.742079.
143. Song, K.S.; Li, G.; Kim, J.S.; Jing, K.; Kim, T.D.; Kim, J.P.; Seo, S.B.; Yoo, J.K.; Park, H.D.; Hwang, B.D.; Lim, K.; Yoon, W.H. Protein-bound polysaccharide from *Phellinus linteus* inhibits tumor growth, invasion, and angiogenesis and alters Wnt/ $\beta$ -catenin in SW480 human colon cancer cells. *BMC Cancer* **2011**, *11*, doi:10.1186/1471-2407-11-307.
  144. Mei, Y.; Zhu, H.; Hu, Q.; Liu, Y.; Zhao, S.; Peng, N.; Liang, Y. Y. A novel polysaccharide from mycelia of cultured *Phellinus linteus* displays antitumor activity through apoptosis. *Carbohydr. Polym.* **2015**, *124*, 90–97, doi:10.1016/J.CARBPOL.2015.02.009.
  145. Lu, T.L.; Huang, G.J.; Lu, T.J.; Wu, J.B.; Wu, C.H.; Yang, T.C.; Iizuka, A.; Chen, Y.F. Hispolon from *Phellinus linteus* has antiproliferative effects via MDM2-recruited ERK1/2 activity in breast and bladder cancer cells. *Food Chem. Toxicol.* **2009**, *47*, 2013–2021, doi:10.1016/J.FCT.2009.05.023.
  146. Zhang, G.Q.; Sun, J.; Wang, H.X.; Ng, T.B. A novel lectin with antiproliferative activity from the medicinal mushroom *Pholiota adiposa*. *Acta Biochim Pol.* **2009**, *56*, 415–421.
  147. Jagadeesh, R.; Babu, G.; Lakshmanan, H.; Oh, O.M.-J.; Jang, J.K.-Y.; Kong, K.W.-S.; Raaman, N. Bioactive sterol derivatives isolated from the *Pleurotus djamor* var. *roseus* Induced apoptosis in cancer cell lines. *Cardiovasc. Hematol. Agents Med. Chem.* **2020**, *18*, 124–134, doi:10.2174/1871525718666200303123557.
  148. Finimundy, T.C.; Abreu, R.M.V.; Bonetto, N.; Scariot, F.J.; Dillon, A.J.P.; Echeverrigaray, S.; Barros, L.; Ferreira, I.C.F.R.; Henriques, J.A.P.; Roesch-Ely, M. Apoptosis induction by *Pleurotus sajor-caju* (Fr.) Singer extracts on colorectal cancer cell lines. *Food Chem. Toxicol.* **2018**, *112*, 383–392, doi:10.1016/j.fct.2018.01.015.
  149. Kobori, M.; Yoshida, M.; Ohnishi-Kameyama, M.; Shinmoto, H. Ergosterol peroxide from an edible mushroom suppresses inflammatory responses in RAW264.7 macrophages and growth of HT29 colon adenocarcinoma cells. *Br. J. Pharmacol.* **2007**, *150*, 209–219, doi:10.1038/sj.bjp.0706972.
  150. Norikura, T.; Fujiwara, K.; Yanai, T.; Sano, Y.; Sato, T.; Tsunoda, T.; Kushibe, K.; Todate, A.; Morinaga, Y.; Iwai, K.; et al. P-terphenyl derivatives from the mushroom *Thelephora aurantiotincta* suppress the proliferation of human hepatocellular carcinoma cells via iron chelation. *J. Agric. Food Chem.* **2013**, *61*, 1258–1264, doi:10.1021/jf3041098.
  151. Wang, H.X.; Liu, W.K.; Ng, T.B.; Ooi, V.E.C.; Chang, S.T. The immunomodulatory and antitumor activities of lectins from the mushroom *Tricholoma mongolicum*. *Immunopharmacology* **1996**, *31*, 205–211, doi:10.1016/0162-3109(95)00049-6.
  152. Jeong, J.W.; Lee, W.S.; Go, S.I.; Nagappan, A.; Baek, J.Y.; Lee, J.D.; Lee, S.J.; Park, C.; Kim, G.Y.; Kim, H.J.; Kim, G.S.; Kwon, T.K.; Ryu, C.H.; Shin, S.C.; Choi, Y.H.; Pachymic acid induces apoptosis of bladder cancer cells by DR5 up-regulation, ROS generation, modulation of Bcl-2 and IAP family members. *Phytother. Res.* **2015**, *29*, 1516–1524, doi:10.1002/PTR.5402.
  153. Ma, J.; Liu, J.; Lu, C.; Cai, D. Pachymic acid induces apoptosis via activating ROS-dependent JNK and ER stress pathways in lung cancer cells. *Cancer Cell Int.* **2015**, *15*, doi:10.1186/S12935-015-0230-0.
  154. Jiang, Y.; Fan, L. Evaluation of anticancer activities of *Poria cocos* ethanol extract in breast cancer: In vivo and in vitro, identification and mechanism. *J. Ethnopharmacol.* **2020**, *257*, doi:10.1016/J.JEP.2020.112851.
